# Supplementary material for: Giant electrically tunable magnon transport anisotropy in a van der Waals antiferromagnetic insulator
Source: PubMed Central journal article supplement (PMC10154397; doi:10.1038/s41467-023-38172-7), 2023-05-02
Supplement: 41467_2023_38172_MOESM1_ESM.pdf [file 41467_2023_38172_MOESM1_ESM.pdf]

1 **Supplementary information for**  
2 **Giant electrically tunable magnon transport anisotropy**  
3 **in a van der Waals antiferromagnetic insulator**

4 Shaomian Qi<sup>1†</sup>, Di Chen<sup>2†</sup>, Kangyao Chen<sup>1</sup>, Jianqiao Liu<sup>1</sup>, Guangyi Chen<sup>1</sup>, Bingcheng  
5 Luo<sup>1</sup>, Hang Cui<sup>1</sup>, Linhao Jia<sup>1,2</sup>, Jiankun Li<sup>2</sup>, Miaoling Huang<sup>2</sup>, Yuanjun Song<sup>2</sup>, Shiyi  
6 Han<sup>3</sup>, Lianming Tong<sup>3</sup>, Peng Yu<sup>4</sup>, Yi Liu<sup>5</sup>, Hongyu Wu<sup>6</sup>, Shiwei Wu<sup>7</sup>, Jiang Xiao<sup>7</sup>,  
7 Ryuichi Shindou<sup>1</sup>, X.C. Xie<sup>1,2</sup>, Jian-Hao Chen<sup>1,2,8,9\*</sup>

8 <sup>1</sup>International Center of Quantum Materials, School of Physics, Peking University,  
9 Beijing, China

10 <sup>2</sup>Beijing Academy of Quantum Information Sciences, Beijing, China

11 <sup>3</sup>College of Chemistry and Molecular Engineering, Peking University, Beijing, China

12 <sup>4</sup>State Key Laboratory of Optoelectronic Materials and Technologies, School of  
13 Materials Science and Engineering, Sun Yat-sen University, Guangzhou, China

14 <sup>5</sup>Center for Advanced Quantum Studies and Department of Physics, Beijing Normal  
15 University, Beijing, China

16 <sup>6</sup>Key Laboratory of Magnetic Materials and Devices, Zhejiang Province Key  
17 Laboratory of Magnetic Materials and Application Technology, Ningbo Institute of  
18 Materials Technology and Engineering, Chinese Academy of Sciences, Ningbo, China

19 <sup>7</sup>Department of Physics and State Key Laboratory of Surface Physics, Fudan  
20 University, Shanghai, China

21 <sup>8</sup>Key Laboratory for the Physics and Chemistry of Nanodevices, Peking University,  
22 Beijing, China

23 <sup>9</sup>Interdisciplinary Institute of Light-Element Quantum Materials and Research Center  
24 for Light-Element Advanced Materials, Peking University, Beijing

25  
26 †These authors contributed equally to this work.

27 \*E-mail: Jian-Hao Chen (chenjianhao@pku.edu.cn)

28  
29  
30  
31

|    |                                                                                                                                                                                       |
|----|---------------------------------------------------------------------------------------------------------------------------------------------------------------------------------------|
| 32 | <b>Table of Contents:</b>                                                                                                                                                             |
| 33 | <b>S1. The insulating properties of CrPS<sub>4</sub> flake</b>                                                                                                                        |
| 34 | <b>S2. Determination of crystallographic orientation of CrPS<sub>4</sub></b>                                                                                                          |
| 35 | <b>S3. Anisotropic magnon transport for more CrPS<sub>4</sub> devices</b>                                                                                                             |
| 36 | <b>S4. The normalized <math>V_{2\omega,0}(I_{gate})/V_{2\omega,0}</math> curves of the anisotropic magnon valves</b>                                                                  |
| 37 | <b>S5. <math>V_{2\omega}</math> vs. <math>\theta</math> of a typical pair of CrPS<sub>4</sub> devices along <math>\langle 010 \rangle</math> and <math>\langle 100 \rangle</math></b> |
| 38 | <b>directions at various <math>I_{gate}</math></b>                                                                                                                                    |
| 39 | <b>S6. Local spin Seebeck measurements in CrPS<sub>4</sub> magnon valves</b>                                                                                                          |
| 40 | <b>S7. Irrelevance of anomalous Nernst effect in CrPS<sub>4</sub> magnon valves</b>                                                                                                   |
| 41 | <b>S8. Spin model of CrPS<sub>4</sub> under an in-plane magnetic field</b>                                                                                                            |
| 42 | <b>S9. Modeling spin Seebeck effect in CrPS<sub>4</sub></b>                                                                                                                           |
| 43 | <b>S10. Ignorable out-of-plane spin Seebeck coefficient <math>S_z(T)</math></b>                                                                                                       |
| 44 | <b>S11. Finite element analysis of the temperature and spin chemical potential</b>                                                                                                    |
| 45 | <b>distribution in CrPS<sub>4</sub> device</b>                                                                                                                                        |
| 46 | <b>S12. Simulated and experimental <math>V_{2\omega,0}^S</math> and <math>V_{2\omega,0}^W</math> vs. <math>I_{gate}</math> curves</b>                                                 |
| 47 | <b>S13. Simulation analysis for anisotropic magnon transport tuning</b>                                                                                                               |
| 48 | <b>S14. Stability test of few-layer CrPS<sub>4</sub> device</b>                                                                                                                       |
| 49 | <b>S15. Possible applications of the magnon ROM</b>                                                                                                                                   |
| 50 |                                                                                                                                                                                       |
| 51 |                                                                                                                                                                                       |
| 52 |                                                                                                                                                                                       |

53 **S1. The insulating properties of CrPS<sub>4</sub> flake**

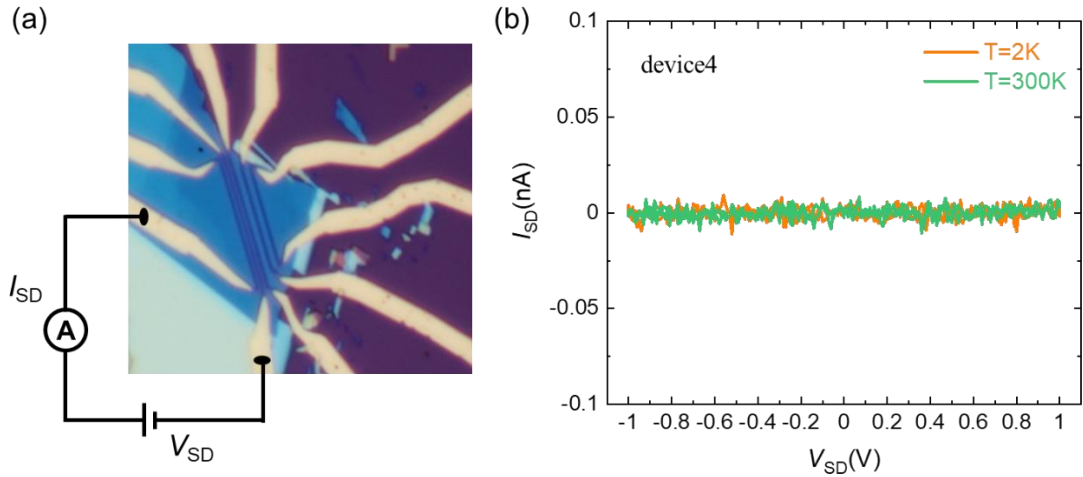

54

55 **Fig. S1. The insulating properties of CrPS<sub>4</sub> flake.** (a) Schematic of the two-probe  
56 measurement geometry on the CrPS<sub>4</sub> device. (b) The current vs. voltage curves  
57 between two parallel Pt electrodes across 750 nm CrPS<sub>4</sub> channel at  $T = 2$  K and 300  
58 K.

59

60 **S2. Determination of crystallographic orientation of CrPS<sub>4</sub>**

61 To study the anisotropic magnon transport, it is necessary to fabricate the two  
62 magnon valve devices strictly along the  $\langle 100 \rangle$  and  $\langle 010 \rangle$  crystallographic directions.  
63 The achievement of such alignment is ensured in the following two ways. First of all,  
64 both transmission electron microscopy and polarized optical microscopy have shown  
65 that the exfoliated CrPS<sub>4</sub> samples often cleave along the  $\langle 110 \rangle$  direction, i.e., along  
66 the diagonal Cr atom rows with respect to the  $\langle 100 \rangle$  direction and  $\langle 010 \rangle$  direction,  
67 forming an acute angle of  $67.5^\circ$  in between<sup>1,2</sup>. The existence of such easy cleavage  
68 lines allows ones to readily identify the crystallographic orientations of CrPS<sub>4</sub>  
69 samples optically as annotated in Fig. 1b in the main text. As expected, our exfoliated  
70 CrPS<sub>4</sub> samples were terminated with straight edges that formed characteristic angle  
71  $67.5^\circ$  as shown in Fig. 1d in the main text, so that the diagonal line of the angle  $67.5^\circ$   
72 is the  $\langle 100 \rangle$  direction.

73

74

75 The second method to determine the crystal orientation is angle-dependent  
76 linearly polarized Raman spectroscopy<sup>3,4</sup>. In the particular case of CrPS<sub>4</sub> thin flakes,  
77 the Raman  $A_2$  mode at 169.0 cm<sup>-1</sup> (when excited by a laser of 514 nm and 633 nm in  
78 wavelength) has a two-fold angular dependence in the intensity pointing along the  
79  $\langle 010 \rangle$  direction<sup>4</sup>. We acquired such Raman data after the fabrication of the CrPS<sub>4</sub>  
80 devices and confirmed the accurate alignment of our devices with the respective  
81 crystal axes. As illustrated in Fig. S2a, Raman scattering measurements were  
82 performed using 532 nm laser excitation in a back-scattering micro-Raman  
83 configuration with HR800 (Jobin Yvon Horiba). Polarized measurements in the  
84 parallel and cross configurations are obtained by adjusting the relative angle between  
85 polarizer2 at the scattered light path and polarizer1 at the incident light path. To vary  
86 the azimuthal angle, we rotated the sample in a step of 10° using a rotational mount.  
87 We define the angle between the  $x$  axis and the incident beam polarization vector  $\mathbf{e}_i$   
88 as  $\theta$  shown in Fig. S2b.

89  
90 CrPS<sub>4</sub> belongs to  $C_2$  point group with one unit cell containing Cr<sub>2</sub>P<sub>2</sub>S<sub>8</sub>. The lattice  
91 vibrations at the Brillouin zone center consist of the following irreducible  
92 representations:  $17A + 19B$ , in which all the optical modes ( $16A+17B$ ) are  
93 Raman-active<sup>4</sup>. As shown in the polarized angle-dependent spectra for the region of  
94 100-600 cm<sup>-1</sup> (Fig. S2c,d), the intensity of each Raman peak varied substantially as a  
95 function of  $\theta$ , which reveals the lattice symmetry. According to the polarization  
96 selection rules, the angle-dependent Raman mode intensity is represented as:

$$97 \quad I \propto |\mathbf{e}_i \cdot \tilde{\mathbf{R}} \cdot \mathbf{e}_s|^2 \quad (S1)$$

98 where  $\mathbf{e}_i$  and  $\mathbf{e}_s$  are the polarization vectors for the incident light and scattered light,  
99 respectively, and  $\tilde{\mathbf{R}}$  is the Raman tensor of a given mode. The Raman tensors  
100 corresponding to  $C_2$  symmetry group are expressed as:

$$101 \quad \tilde{\mathbf{R}}(A) = \begin{pmatrix} be^{i\Phi_b} & 0 & de^{i\Phi_d} \\ 0 & ce^{i\Phi_c} & 0 \\ de^{i\Phi_d} & 0 & ae^{i\Phi_a} \end{pmatrix}, \quad \tilde{\mathbf{R}}(B) = \begin{pmatrix} 0 & fe^{i\Phi_f} & 0 \\ fe^{i\Phi_f} & 0 & ee^{i\Phi_e} \\ 0 & ee^{i\Phi_e} & 0 \end{pmatrix} \quad (S2)$$

102

103 By substituting the polarization vectors with parallel and cross configurations as  
 104 well as the Raman tensors into equation S1, the following expressions can be obtained  
 105 for the Raman intensities in the parallel ( $\parallel$ ) and cross ( $\perp$ ) configuration for both types  
 106 of Raman peaks:

$$107 \quad I_A^{\parallel} \propto b^2 \sin^4 \theta + c^2 \cos^4 \theta + 2bc \sin^2 \theta \cos^2 \theta \cos \Phi_{bc} \quad (\text{S3})$$

$$108 \quad I_A^{\perp} \propto \sin^2 \theta \cos^2 \theta (b^2 + c^2 - 2bc \cos \Phi_{bc}) \quad (\text{S4})$$

$$109 \quad I_B^{\parallel} \propto (f \sin 2\theta)^2 \quad (\text{S5})$$

$$110 \quad I_B^{\perp} \propto (f \cos 2\theta)^2 \quad (\text{S6})$$

111 where  $\Phi_{bc}$  is the difference between  $\Phi_b$  and  $\Phi_c$ . It is straightforward that B modes  
 112 have a four-fold symmetry with maxima at  $0^\circ$  and  $90^\circ$  in cross polarization  
 113 configuration, which gives  $\langle 100 \rangle$  and  $\langle 010 \rangle$  axes. Particularly, A modes have a  
 114 two-fold symmetry in parallel polarization configuration, which helps us to  
 115 distinguish  $\langle 100 \rangle$  and  $\langle 010 \rangle$  axes. Fig. S2e and S2f display the polar graphs of peak  
 116 intensities  $I_B^{\perp}$  for  $B_5$  mode ( $256.6\text{cm}^{-1}$ ) and  $I_A^{\parallel}$  for  $A_2$  mode ( $169.0\text{cm}^{-1}$ ) as a function  
 117 of the azimuthal angle  $\theta$ , respectively. The  $A_2$  mode have a two-fold symmetry with  
 118 maxima at  $90^\circ$  in parallel polarization configuration, implying that the  $x$  axis we  
 119 defined is the  $\langle 100 \rangle$  direction, which is consistent with previous report<sup>4</sup>.

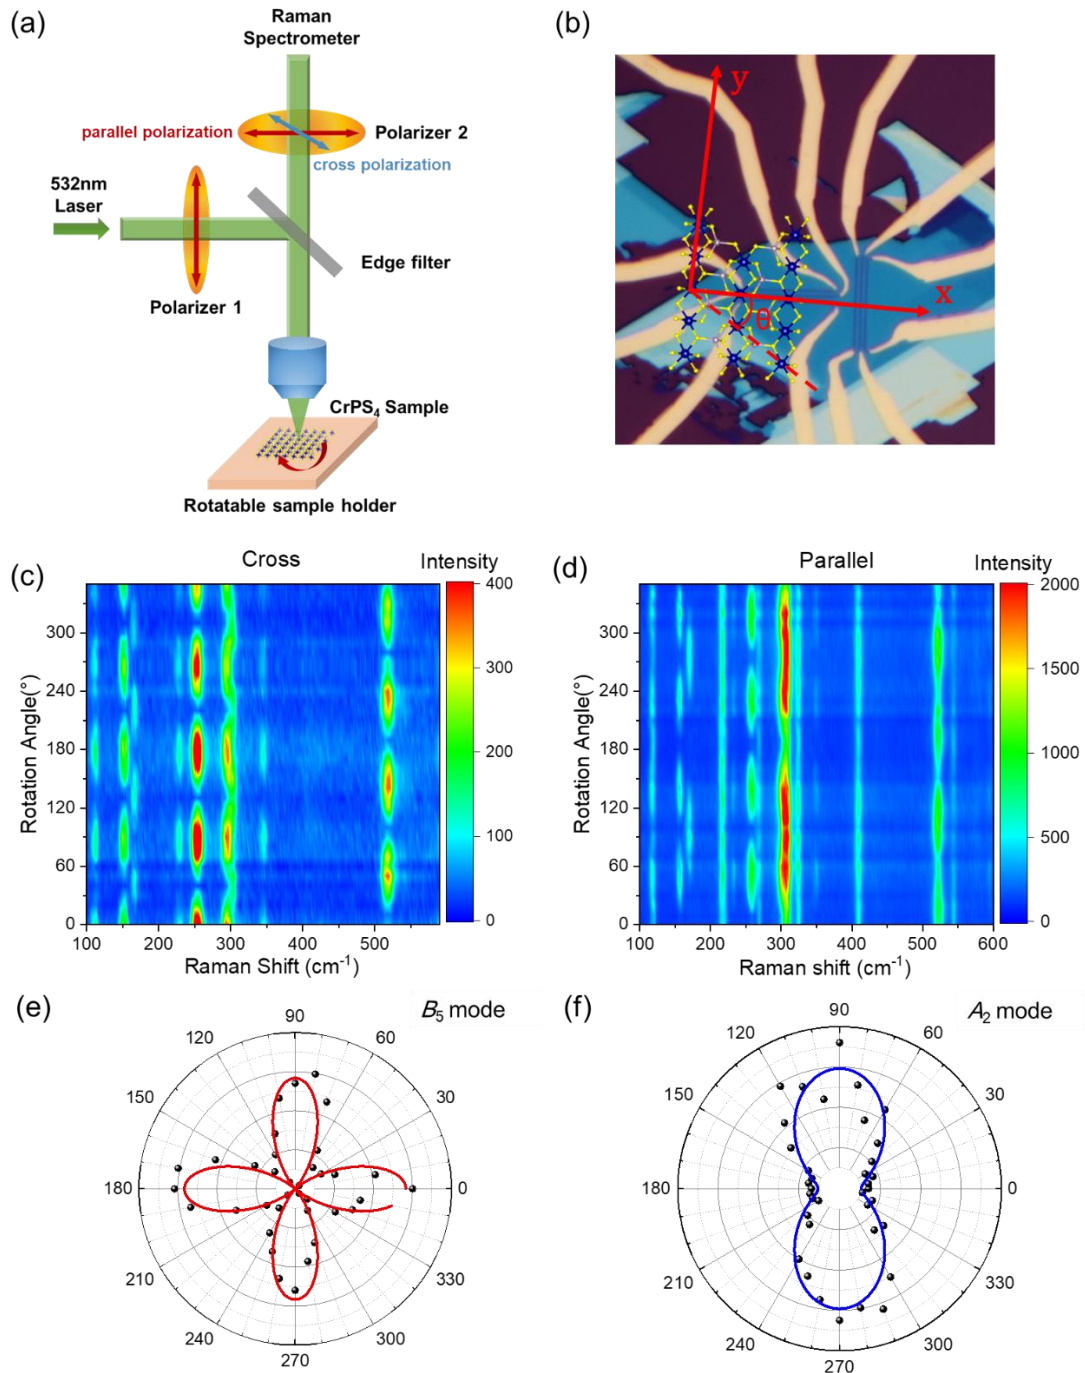

120

121 **Fig. S2. Angle-dependent Raman spectroscopy of a CrPS<sub>4</sub> device.** (a) Schematic of  
 122 the angle-dependent polarized Raman scattering measurement. (b) Optical image of a  
 123 typical CrPS<sub>4</sub> device and the definition of azimuthal angle  $\theta$ . (c) Angle-dependent  
 124 Raman spectra intensity plot under cross polarization configuration. (d)  
 125 Angle-dependent Raman spectra intensity plot under parallel polarization  
 126 configuration. (e) Polar graph of cross Raman signals of  $B_5$  mode. Red solid line is a  
 127 fit to equation S6. (f) Polar graph of parallel Raman signals of  $A_2$  mode. Blue solid

128 line is a fit to equation S3.

129

130 **S3. Anisotropic magnon transport for more CrPS<sub>4</sub> devices**

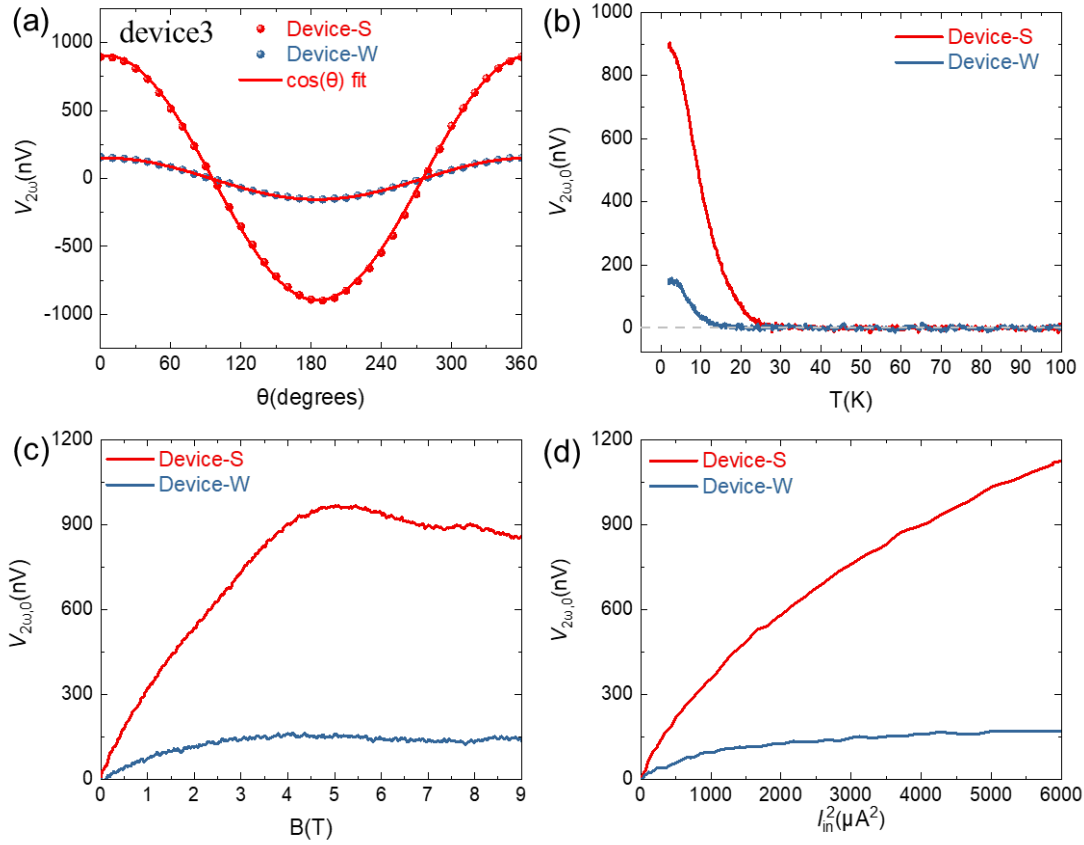

131

132 **Fig. S3.1. Anisotropic magnon transport of another CrPS<sub>4</sub> device with channel**

133 **length of 1.5 μm.** (a)  $V_{2\omega}$  as a function of the angle  $\theta$  between the external magnetic

134 field  $\mathbf{B}$  and the direction perpendicular to Pt bars. The solid lines are fittings to cosine

135 function. (b) Temperature dependence of  $V_{2\omega}$  at  $\theta = 0$  ( $V_{2\omega,0}$ ). (c) Magnetic field

136 dependence of  $V_{2\omega,0}$ . (d)  $V_{2\omega,0}$  versus the square of the injection current  $I_{in}^2$ . Red

137 and blue curves show magnon transport signals taken along the  $\langle 010 \rangle$  (Device-S) and

138  $\langle 100 \rangle$  (Device-W) directions of the CrPS<sub>4</sub> crystal, respectively.

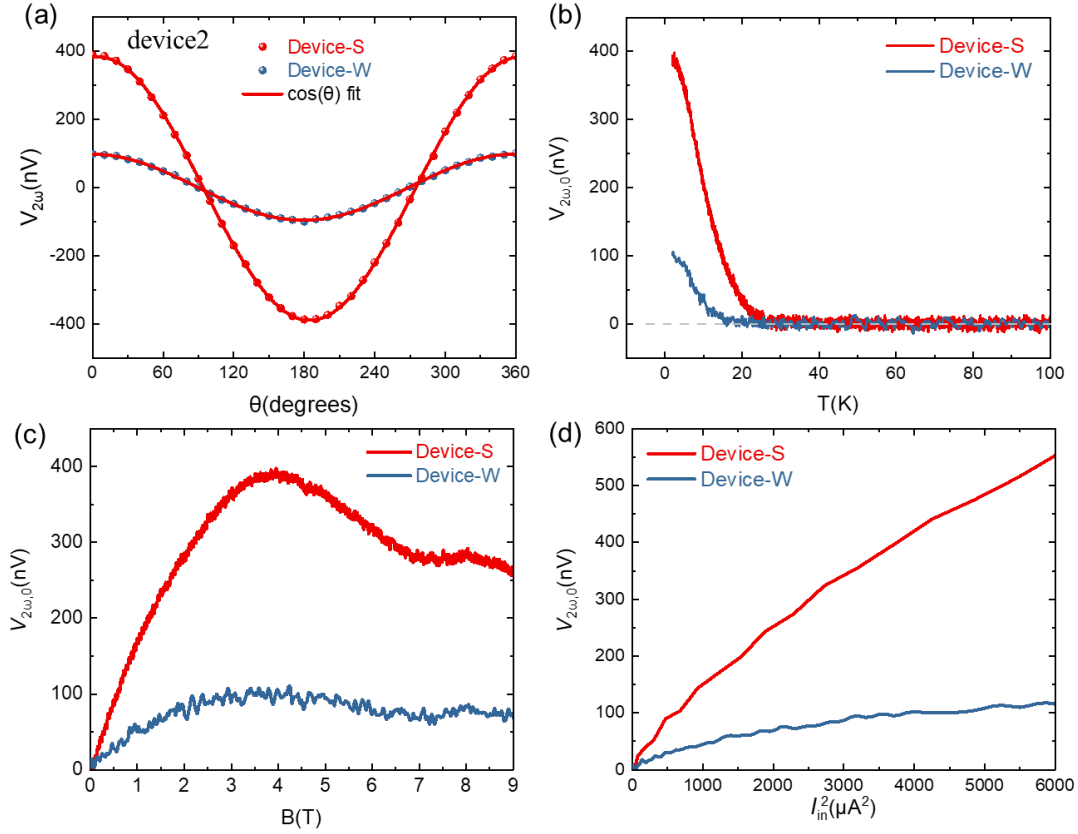

139

140 **Fig. S3.2. Anisotropic magnon transport of another CrPS<sub>4</sub> device with channel**  
 141 **length of 1.5 μm.** (a)  $V_{2\omega}$  as a function of the angle  $\theta$  between the external magnetic  
 142 field  $\mathbf{B}$  and the direction perpendicular to Pt bars. The solid lines are fittings to cosine  
 143 function. (b) Temperature dependence of  $V_{2\omega}$  at  $\theta = 0$  ( $V_{2\omega,0}$ ). (c) Magnetic field  
 144 dependence of  $V_{2\omega,0}$ . (d)  $V_{2\omega,0}$  versus the square of the injection current  $I_{in}^2$ . Red  
 145 and blue curves show magnon transport signals taken along the  $\langle 010 \rangle$  (Device-S) and  
 146  $\langle 100 \rangle$  (Device-W) directions of the CrPS<sub>4</sub> crystal, respectively.

147

148

149

150

151

152

153

154

155



156 **S4. The normalized  $V_{2\omega,0}(I_{gate})/V_{2\omega,0}$  curves of the anisotropic magnon valves**

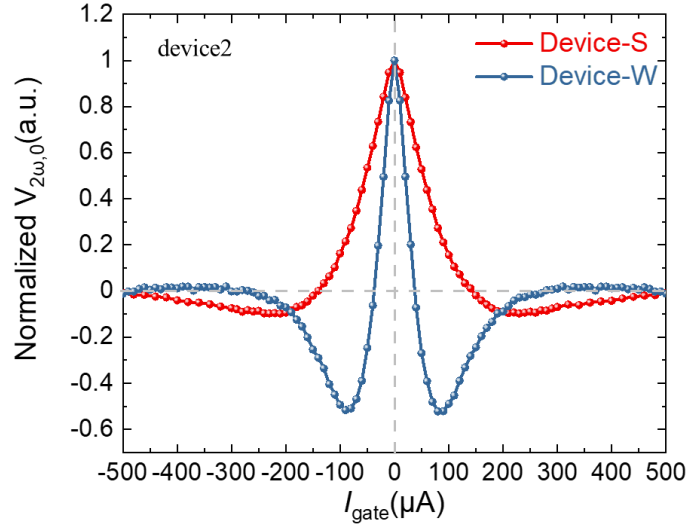

157

158 **Fig. S4.** Normalized  $I_{gate}$  dependent  $V_{2\omega,0}$  curves of the data shown in Fig. 3a of  
 159 the main text.

160

161 **S5.  $V_{2\omega}$  vs.  $\theta$  of a typical pair of CrPS<sub>4</sub> devices along  $\langle 010 \rangle$  and  $\langle 100 \rangle$**   
 162 **directions at various  $I_{gate}$**

163

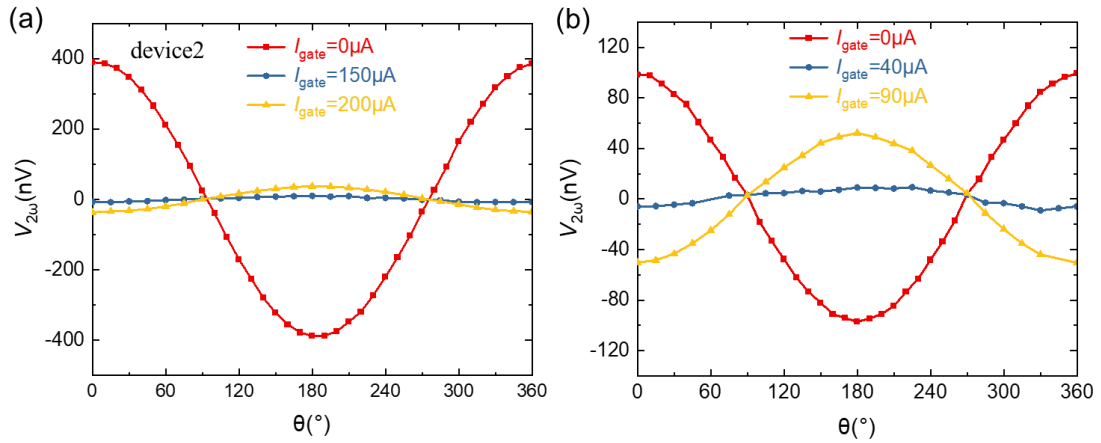

164

165 **Fig. S5. Magnetic field angle dependent  $V_{2\omega}$  of a typical CrPS<sub>4</sub> device at various**  
 166  **$I_{gate}$ .** (a)  $V_{2\omega}^S$  for Device-S as a function of angle  $\theta$  of the external magnetic field at  
 167  $I_{gate} = 0, 150, 200 \mu A$ . (b)  $V_{2\omega}^W$  for Device-W as a function of angle  $\theta$  of the external  
 168 magnetic field at  $I_{gate} = 0, 40, 90 \mu A$ . The  $\cos\theta$  dependence of the curves confirms  
 169 the thermal magnon nature of the signal.

170

## 171 S6. Local spin Seebeck measurements in CrPS<sub>4</sub> magnon valves

172 Here, the definition of “local spin Seebeck effect” in our nonlocal measurement  
173 configuration is two-fold: 1) nonlocal transport of phonons in the CrPS<sub>4</sub> channel  
174 instead of magnons; 2) the nonlocal phonons created temperature gradient at the  
175 detector-CrPS<sub>4</sub> interface and produced second harmonic signal via local spin Seebeck  
176 effect.

177  
178 To eliminate the possibility of such local spin Seebeck effect in our nonlocal  
179 measurement configuration, we measured the local spin Seebeck signal of the injector  
180 electrode  $V_{2\omega,local}$  as a function of  $I_{gate}$  through the gate electrode next to the  
181 injector electrode. As shown in Fig. S6a-b, the  $V_{2\omega,local}(I_{gate})$  curves with magnetic  
182 field direction  $\theta = 0^\circ$  and  $180^\circ$  for Device-S and Device-W under the same  
183 experimental conditions as in our nonlocal measurements. The  $V_{2\omega,local}$  signals have  
184 constant offsets, thus we can define the pure local spin Seebeck signal without offset  
185 to be:

$$186 \quad V_{2\omega,pure} = [V_{2\omega,local}(I_{gate}, \theta = 180^\circ) - V_{2\omega,local}(I_{gate}, \theta = 0^\circ)]/2$$

187 and the offset voltage to be:

$$188 \quad V_{offset} = [V_{2\omega,local}(I_{gate}, \theta = 180^\circ) + V_{2\omega,local}(I_{gate}, \theta = 0^\circ)]/2$$

189 which are shown in Fig. S6c-d. Device-S and Device-W have very similar  
190  $V_{offset}(I_{gate})$  curves that are independent of magnetic field directions and  
191 crystallographic directions, which indicate an ordinary Seebeck effect from the Pt  
192 electrodes.

193  
194 In order to verify the spin Seebeck effect nature of the  $V_{2\omega,pure}$  and the  
195 non-magnetic nature of  $V_{offset}$ , magnetic field angle dependence of the raw data, i.e.,  
196  $V_{2\omega,local}(I_{gate})$  vs.  $\theta$  is shown in Fig. S6e-f. Here Fig. S6e shows the  
197  $V_{2\omega,local}(I_{gate})$  vs.  $\theta$  curves for a set of discrete  $I_{gate}$  values for the strong  
198 exchange coupling direction, whereas Fig. S6f shows similar data for the weak

199 exchange coupling direction. The curves for different  $I_{gate}$  are all fitted to  
200  $-V_{2\omega,pure} \cos(\theta) + V_{offset}$  where  $V_{2\omega,pure}$  and  $V_{offset}$  are fitting parameters. The  
201 fitted parameters are then plotted together with the data in Fig. S6c-d, which are quite  
202 consistent with the anti-symmetric and symmetric components extracted from  
203  $V_{2\omega,local}(I_{gate})$  curves.

204

205 Comparing Fig. S6c with features of the nonlocal  $V_{2\omega,0}(I_{gate})$  curves exhibited  
206 in Fig. 3a in the main text, we can see that the two effects are completely different: 1)  
207 When  $I_{gate} = 0$ , the local  $V_{2\omega,pure}^S$  for Device-S is only 1.8 times of the local  
208  $V_{2\omega,pure}^W$  of Device-W, while for the nonlocal data, such ratio reaches to 4.0 times; 2)  
209  $I_{gate}$  turns the nonlocal signals down for both Device-S and Device-W, however the  
210 local signals don't go to zero and show no inverse sign change like the nonlocal  
211 signals. These features unambiguously show that the magnon diffusive process and  
212 anisotropic magnetic exchange interactions are vital in producing the highly tunable  
213 anisotropic nonlocal signal we reported in the main text.

214

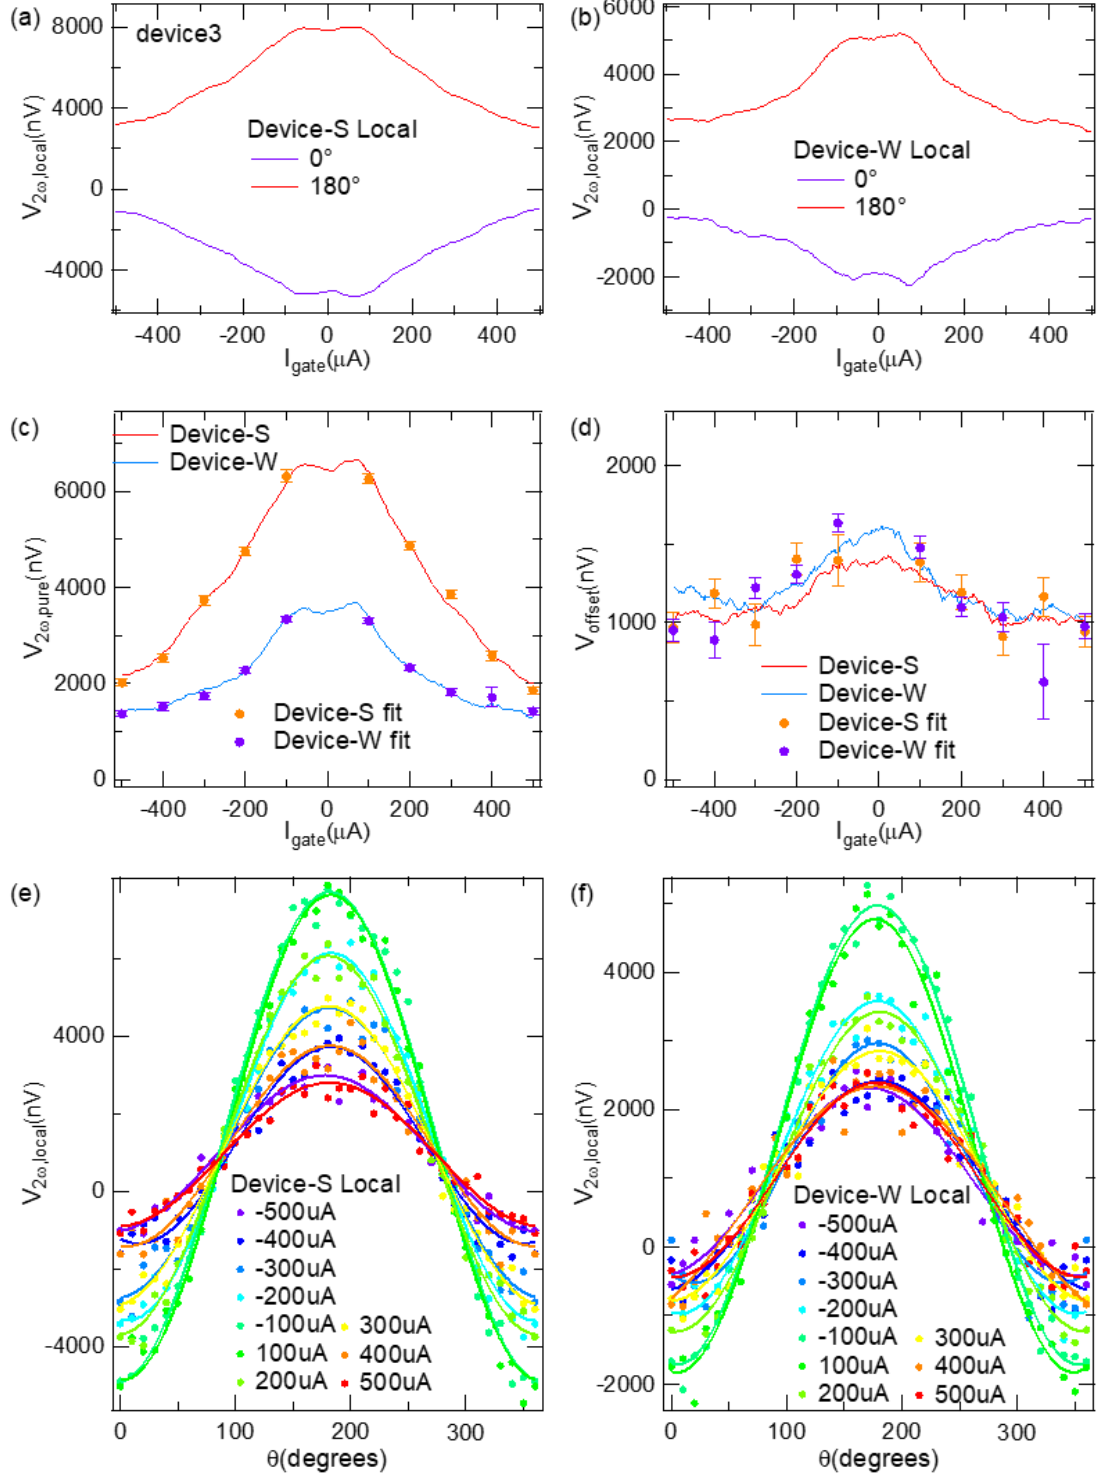

215

216 **Fig. S6. Local spin Seebeck measurements in CrPS<sub>4</sub> magnon valves.** (a) Local  
 217  $V_{2\omega,local}$  vs.  $I_{gate}$  curves for Device-S (Pt electrode perpendicular to the  $\langle 010 \rangle$   
 218 direction) and (b) Device-W (Pt electrode perpendicular to the  $\langle 100 \rangle$  direction) at  
 219  $\mathbf{B} = 4\text{T}$ ,  $I_{in} = 60 \mu\text{A}$  and  $T = 2 \text{K}$ . Purple and red curves show signals taken under  
 220  $\theta = 0^\circ$  and  $180^\circ$  field directions, respectively. (c) Spin Seebeck signal  $V_{2\omega,pure}$  vs.

221  $I_{gate}$  curves and (d) field direction irrelevant  $V_{offset}$  vs.  $I_{gate}$  curves for Device-S  
222 (red curves) and Device-W (blue curves). Orange and purple dots are obtained from  
223 fitting curves in (e) and (f), and the error bar denotes the standard deviation of the  
224 fitting. (e)  $V_{2\omega,local}$  vs. angle  $\theta$  between the external  $B$  field and the direction  
225 perpendicular to respective Pt electrodes for Device-S and (f) Device-W with different  
226  $I_{gate}$ . The solid curves are fits to a cosine function plus a constant.

227

## 228 **S7. Irrelevance of the anomalous Nernst effect in CrPS<sub>4</sub> magnon valves**

229 CrPS<sub>4</sub> is an antiferromagnetic material with intralayer spins ferromagnetically  
230 aligned and interlayer spins antiferromagnetically aligned, which means the topmost  
231 layer contact with Pt is ferromagnetic. In order to quantify the possible effect of the  
232 anomalous Nernst effect in our CrPS<sub>4</sub> devices, we have measured the non-local  
233 second harmonic signal with an applied magnetic field of up to 9 T rotated in the  $x$ - $z$   
234 plane (see inset in Fig. S7 below). The angle of the magnetic field with respect to the  
235  $z$  axis is marked as  $\varphi$ . An injection current of 60  $\mu$ A is applied to the injector of our  
236 CrPS<sub>4</sub> device. We can see from Fig. S7a that the data fits well to a  $\sin\varphi$  function, in  
237 which the signal is zero when the magnetic field is along the  $z$  axis (perpendicular to  
238 the sample plane) and only the magnetic field component along the  $x$  axis could  
239 produce non-zero non-local second harmonic signal. Fig. S7b shows minimal  
240 magnetic-field dependence of the non-local signal with the magnetic field along the  $z$   
241 axis (i.e.,  $\varphi=0$ ). This data proves unambiguously the absence of anomalous Nernst  
242 effect with magnetic field perpendicular to the CrPS<sub>4</sub>/Pt interface (ANE<sub>x</sub>). It's  
243 considered that ANE<sub>x</sub> and ANE<sub>z</sub> are of similar magnitude<sup>5</sup>, where ANE<sub>z</sub> refers to the  
244 Hall voltage along  $y$  induced by the temperature gradient along  $z$  in the presence of  
245 the magnetization along the  $x$  axis. Thus, the absence of ANE<sub>x</sub> points to the absence  
246 of ANE<sub>z</sub> in our CrPS<sub>4</sub> magnon devices, pointing to the irrelevance of anomalous  
247 Nernst effect in the electrically tunable anisotropic SHM response.

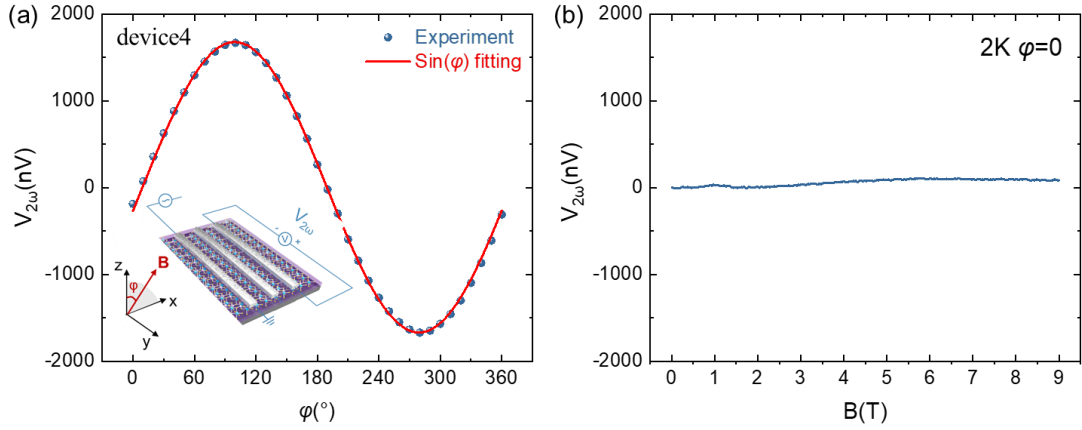

248

249 **Fig. S7. Irrelevance of the anomalous Nernst effect in CrPS<sub>4</sub> device.** (a) The  
 250 non-local second harmonic signal as a function of angle  $\phi$  between the external  
 251 magnetic field ( $\mathbf{B}=9\text{T}$ ) and the  $z$  direction, angle  $\phi$  is defined as shown in the inset. (b)  
 252 Very little magnetic field dependence can be observed for  $V_{2\omega}$  at  $\phi = 0$ , showing that  
 253 anomalous Nernst effect, if exist, does not interfere with our analysis.

254

### 255 S8. Spin model of CrPS<sub>4</sub> under an in-plane magnetic field

256 In this section, we consider a two-dimensional localized spin model with  
 257 easy-axis single-ion anisotropy containing bilayer atoms to describe the A-type  
 258 antiferromagnet CrPS<sub>4</sub>. We carry out spin-wave analysis of the antiferromagnet under  
 259 a transverse magnetic field to obtain low-energy magnon excitations.

260

261 Magnetism for the bilayer CrPS<sub>4</sub> is described by spin model:

$$262 \quad H = H_1 + H_2 + H_{1,2} \quad (\text{S7})$$

$$263 \quad H_1 = \sum_j \sum_{m=1,2,3,4} J_{a_m} \mathbf{S}_{1,j}^A \cdot \mathbf{S}_{1,j+a_m}^B - D \sum_j [(S_{1,j}^{A,z})^2 + (S_{1,j}^{B,z})^2] - h \sum_j [S_{1,j}^{A,y} + S_{1,j}^{B,y}]$$

$$264 \quad H_2 = \sum_j \sum_{m=1,2,3,4} J_{a_m} \mathbf{S}_{2,j}^A \cdot \mathbf{S}_{2,j+a_m}^B - D \sum_j [(S_{2,j}^{A,z})^2 + (S_{2,j}^{B,z})^2] - h \sum_j [S_{2,j}^{A,y} + S_{2,j}^{B,y}]$$

$$265 \quad H_{1,2} = J_c \left[ \sum_j \mathbf{S}_{1,j}^A \cdot \mathbf{S}_{2,j}^A + \mathbf{S}_{1,j}^B \cdot \mathbf{S}_{2,j}^B \right]$$

266 Here  $H_1$  is Hamiltonian for the first layer,  $H_2$  is Hamiltonian for the second layer,  
 267  $H_{1,2}$  describes the interlayer interaction term.  $D$  is the easy-axis single-ion

268 anisotropy and  $J$  is the magnetic exchange coupling with  $J_{a_1} = J_1$ ,  $J_{a_2} = J_2$ ,  $J_{a_3} =$   
 269  $J_3$ ,  $J_{a_4} = J_3$ . The parameters ( $J_1$  to  $J_4$ ) we used are shown in Fig. S8.1, which are  
 270 reported by S. Calder *et al.* from neutron scattering measurements<sup>6</sup>. Subscripts A,B  
 271 represent two sets of sublattices of CrPS<sub>4</sub>,  $\mathbf{j}$  denotes a monoclinic-lattice A-sublattice  
 272 site, and  $\mathbf{a}_m$  ( $m = 1,2,3,4$ ) connects a A-sublattice site and its neighboring four  
 273 B-sublattice site with  $\mathbf{a}_1 = 0$ ,  $\mathbf{a}_2 = \mathbf{e}_2$ ,  $\mathbf{a}_3 = \mathbf{e}_1$ ,  $\mathbf{a}_4 = \mathbf{e}_2 - \mathbf{e}_1$ .  $\mathbf{S}_j^A \equiv$   
 274  $(S_j^{A,x}, S_j^{A,y}, S_j^{A,z})$  is a localized spin of Cr atom ( $S=3/2$ ) in the A-sublattice site ( $\mathbf{j}$ )  
 275 and  $\mathbf{S}_{\mathbf{j}+\mathbf{a}_m}^B$  is a localized Cr spin at the B-sublattice site( $\mathbf{j} + \mathbf{a}_m$ ). For simplicity, we  
 276 consider that the system is a two-dimensional magnet and  $h$  is an in-plane field  
 277 along  $x(y)$ -direction for Device-W (Device-S).

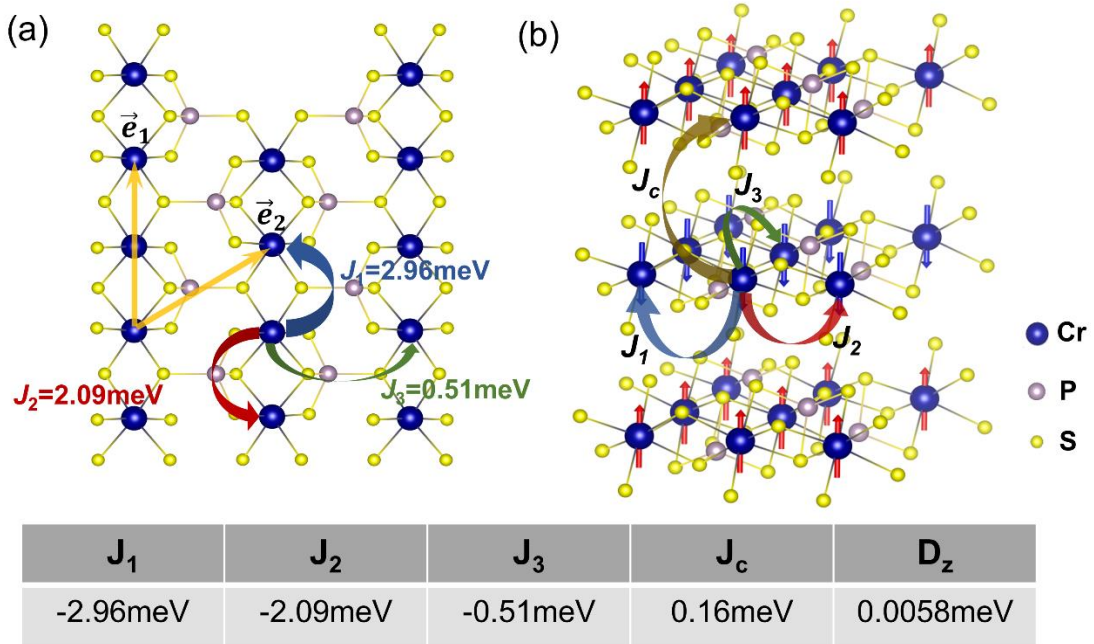

278

279 **Fig. S8.1. Magnetic structure parameters of CrPS<sub>4</sub>[<sup>6</sup>].**

280

281 Under the in-plane field, the antiferromagnetic moment will be deformed linearly  
 282 in the field:

283 
$$\mathbf{S}_{1,j}^A = \mathbf{S}_{1,j}^B = S(0, \sin\psi, \cos\psi)$$

284 
$$\mathbf{S}_{2,j}^A = \mathbf{S}_{2,j}^B = S(0, \sin\psi, -\cos\psi)$$

285 A canting angle is determined classically as a minimum of a classical magnetic  
286 energy:

$$287 \quad E_{classical} = 2N(J_c S^2 (\sin^2 \psi - \cos^2 \psi) - 2DS^2 \cos^2 \psi - 2hS \sin \psi),$$

288 where  $N$  is a number of the A-sublattice sites. The minimum energy is given by:

$$289 \quad \sin \psi = \frac{h}{2(2J_c + D)S} \quad (\text{S8})$$

290 Magnetic collective excitations around the classical magnetic order are described  
291 by Holstein-Primakoff bosons:

$$292 \quad \tilde{S}_{1,j}^{A,z} = S - a_{1,j}^\dagger a_{1,j}, \quad \tilde{S}_{1,j}^{A,x} - i\tilde{S}_{1,j}^{A,y} = \sqrt{2S}a_{1,j}^\dagger, \quad \tilde{S}_{1,j}^{A,x} + i\tilde{S}_{1,j}^{A,y} = \sqrt{2S}a_{1,j}$$

$$293 \quad \tilde{S}_{1,j}^{B,z} = S - b_{1,j}^\dagger b_{1,j}, \quad \tilde{S}_{1,j}^{B,x} - i\tilde{S}_{1,j}^{B,y} = \sqrt{2S}b_{1,j}^\dagger, \quad \tilde{S}_{1,j}^{B,x} + i\tilde{S}_{1,j}^{B,y} = \sqrt{2S}b_{1,j}$$

$$294 \quad \tilde{S}_{2,j}^{A,z} = S - a_{2,j}^\dagger a_{2,j}, \quad \tilde{S}_{2,j}^{A,x} - i\tilde{S}_{2,j}^{A,y} = \sqrt{2S}a_{2,j}^\dagger, \quad \tilde{S}_{2,j}^{A,x} + i\tilde{S}_{2,j}^{A,y} = \sqrt{2S}a_{2,j}$$

$$295 \quad \tilde{S}_{2,j}^{B,z} = S - b_{2,j}^\dagger b_{2,j}, \quad \tilde{S}_{2,j}^{B,x} - i\tilde{S}_{2,j}^{B,y} = \sqrt{2S}b_{2,j}^\dagger, \quad \tilde{S}_{2,j}^{B,x} + i\tilde{S}_{2,j}^{B,y} = \sqrt{2S}b_{2,j}$$

296 where  $(\tilde{S}_j^{A,x}, \tilde{S}_j^{A,y}, \tilde{S}_j^{A,z})$  and  $(\tilde{S}_j^{B,x}, \tilde{S}_j^{B,y}, \tilde{S}_j^{B,z})$  are the spin operators in a rotated  
297 frame:

$$298 \quad \begin{pmatrix} \tilde{S}_{1,j}^{\alpha,x} \\ \tilde{S}_{1,j}^{\alpha,y} \\ \tilde{S}_{1,j}^{\alpha,z} \end{pmatrix} = \begin{pmatrix} 1 & 0 & 0 \\ 0 & \cos\psi & -\sin\psi \\ 0 & \sin\psi & \cos\psi \end{pmatrix} \begin{pmatrix} S_{1,j}^{\alpha,x} \\ S_{1,j}^{\alpha,y} \\ S_{1,j}^{\alpha,z} \end{pmatrix}$$

$$299 \quad \begin{pmatrix} \tilde{S}_{2,j}^{\alpha,x} \\ \tilde{S}_{2,j}^{\alpha,y} \\ \tilde{S}_{2,j}^{\alpha,z} \end{pmatrix} = \begin{pmatrix} 1 & 0 & 0 \\ 0 & -\cos\psi & -\sin\psi \\ 0 & \sin\psi & -\cos\psi \end{pmatrix} \begin{pmatrix} S_{2,j}^{\alpha,x} \\ S_{2,j}^{\alpha,y} \\ S_{2,j}^{\alpha,z} \end{pmatrix}$$

300 Here  $\alpha = A, B$ ,  $a$  and  $b$  are Holstein-Primakoff boson fields for A-sublattice Cr  
301 spin and B-sublattice Cr spin, that represent fluctuations around the classical magnetic  
302 order. Around those  $\psi$  that minimize the classical magnetic energy, the Hamiltonian  
303 is stable against such small fluctuations:

$$304 \quad H \equiv E_{classical} + H_{sw} + \mathcal{O}(a^3, b^3)$$

305

306 That says, a spin-wave Hamiltonian  $H_{sw}$  is given by a quadratic form in the  
307 boson fields. We use equation S8 to replace  $h$  by  $J$  and  $D$ , and transform the  
308 spin-wave Hamiltonian into the momentum space:



313  $H_{magnon}$

314  $= \Psi^+(\mathbf{k}) \begin{bmatrix} M_0 & f(k) & N_2 & 0 & N_0 & 0 & N_1 & 0 \\ f^*(k) & M_0 & 0 & N_2 & 0 & N_0 & 0 & N_1 \\ N_2 & 0 & M_0 & f(k) & N_1 & 0 & N_0 & 0 \\ 0 & N_2 & f^*(k) & M_0 & 0 & N_1 & 0 & N_0 \\ N_0 & 0 & N_1 & 0 & M_0 & f(k) & N_2 & 0 \\ 0 & N_0 & 0 & N_1 & f^*(k) & M_0 & 0 & N_2 \\ N_1 & 0 & N_0 & 0 & N_2 & 0 & M_0 & f(k) \\ 0 & N_1 & 0 & N_0 & 0 & N_2 & f^*(k) & M_0 \end{bmatrix} \Psi(\mathbf{k})$

309 with  $\Psi(\mathbf{k}) = (a_1(\mathbf{k}), b_1(\mathbf{k}), a_2(\mathbf{k}), b_2(\mathbf{k}), a_1^+(-\mathbf{k}), b_1^+(-\mathbf{k}), a_2^+(-\mathbf{k}), b_2^+(-\mathbf{k}))^T$ ,

310  $M_0 = \frac{-J_1S - J_2S - 2J_3S}{2} + DS \cos^2 \psi - \frac{DS}{2} \sin^2 \psi + \frac{\hbar}{2} \sin \psi + \frac{J_c S}{2} \cos 2\psi$ ,  $N_0 =$

311  $\frac{DS}{2} \sin^2 \psi$ ,  $N_1 = \frac{J_c S}{4} (1 + \cos 2\psi)$ ,  $N_2 = \frac{J_c S}{4} (1 - \cos 2\psi)$ ,  $|f(\mathbf{k})|$  and  $\varphi_{\mathbf{k}}$  are the

312 modulus and phase of  $f(\mathbf{k}) = \frac{S}{2} \sum_{m=1,2,3,4} J_{a_m} e^{i\mathbf{k}a_m} \equiv |f(k)| e^{i\varphi_k}$  respectively.

315 Under

316  $\Psi(\mathbf{k}) = \sigma_0 \otimes \begin{pmatrix} 1 & -1 \\ 1 & 1 \end{pmatrix} \otimes \frac{1}{2} \begin{pmatrix} e^{i\varphi_k} & -e^{i\varphi_k} \\ 1 & 1 \end{pmatrix} \Psi'(\mathbf{k})$

317  $\begin{pmatrix} \Psi'_i(\mathbf{k}) \\ \Psi'_i{}^+(-\mathbf{k}) \end{pmatrix} = \begin{pmatrix} \cosh \frac{\delta_i}{2} & -\sinh \frac{\delta_i}{2} \\ -\sinh \frac{\delta_i}{2} & \cosh \frac{\delta_i}{2} \end{pmatrix} \begin{pmatrix} \gamma_i(\mathbf{k}) \\ \gamma_i^+(-\mathbf{k}) \end{pmatrix}, i = 1, 2, 3, 4$

318 The spin-wave Hamiltonian is diagonalized as,

319  $H_{magnon} = \sum_{\mathbf{k}} (\hbar\omega_1(\mathbf{k}) \gamma_1^\dagger(\mathbf{k}) \gamma_1(\mathbf{k}) + \hbar\omega_2(\mathbf{k}) \gamma_2^\dagger(\mathbf{k}) \gamma_2(\mathbf{k}) + \hbar\omega_3(\mathbf{k}) \gamma_3^\dagger(\mathbf{k}) \gamma_3(\mathbf{k})$

320  $+ \hbar\omega_4(\mathbf{k}) \gamma_4^\dagger(\mathbf{k}) \gamma_4(\mathbf{k}))$

321 Here,

322  $\cosh \delta_1 = \frac{M_0 - N_2 - |f(\mathbf{k})|}{\hbar\omega_1(\mathbf{k})}$ ,  $\sinh \delta_1 = -\frac{N_0 - N_1}{\hbar\omega_1(\mathbf{k})}$

323  $\cosh \delta_2 = \frac{M_0 + N_2 - |f(\mathbf{k})|}{\hbar\omega_2(\mathbf{k})}$ ,  $\sinh \delta_2 = -\frac{N_0 + N_1}{\hbar\omega_2(\mathbf{k})}$

324  $\cosh \delta_3 = \frac{M_0 - N_2 + |f(\mathbf{k})|}{\hbar\omega_3(\mathbf{k})}$ ,  $\sinh \delta_3 = -\frac{N_0 - N_1}{\hbar\omega_3(\mathbf{k})}$

325  $\cosh \delta_4 = \frac{M_0 + N_2 + |f(\mathbf{k})|}{\hbar\omega_4(\mathbf{k})}$ ,  $\sinh \delta_4 = -\frac{N_0 + N_1}{\hbar\omega_4(\mathbf{k})}$

326  $E_1 = \hbar\omega_1(\mathbf{k}) = \sqrt{(|M_0 - N_2| - |f(\mathbf{k})|)^2 - (N_0 - N_1)^2}$

327  $E_2 = \hbar\omega_2(\mathbf{k}) = \sqrt{(|M_0 + N_2| - |f(\mathbf{k})|)^2 - (N_0 + N_1)^2}$

$$\begin{aligned}
328 \quad E_3 &= \hbar\omega_3(\mathbf{k}) = \sqrt{(|M_0 - N_2| + |f(\mathbf{k})|)^2 - (N_0 - N_1)^2} \\
329 \quad E_4 &= \hbar\omega_4(\mathbf{k}) = \sqrt{(|M_0 + N_2| + |f(\mathbf{k})|)^2 - (N_0 + N_1)^2} \quad (S9)
\end{aligned}$$

330

331 Because the weak interlayer magnetic exchange coupling,  $N_0, N_1, N_2$  is much  
332 smaller than other parameters. Thus, band  $E_1$  and  $E_2$  is close to degeneracy, and band  
333  $E_3$  and  $E_4$  is close to degeneracy. The lowest  $E_1$  spin-wave energy momentum  
334 dispersions along high symmetric momentum line are plotted in Fig. S8.2. A highly  
335 anisotropic dispersion is resulted by the anisotropy of magnetic exchange coupling. It  
336 is obvious that the band dispersion along  $k_y$  ( $\langle 010 \rangle$ ) direction (with stronger magnetic  
337 coupling) has a larger group velocity  $\mathbf{v} = \frac{\partial \varepsilon}{\partial k}$ , which will give larger spin current and  
338 corresponding SHM signal.

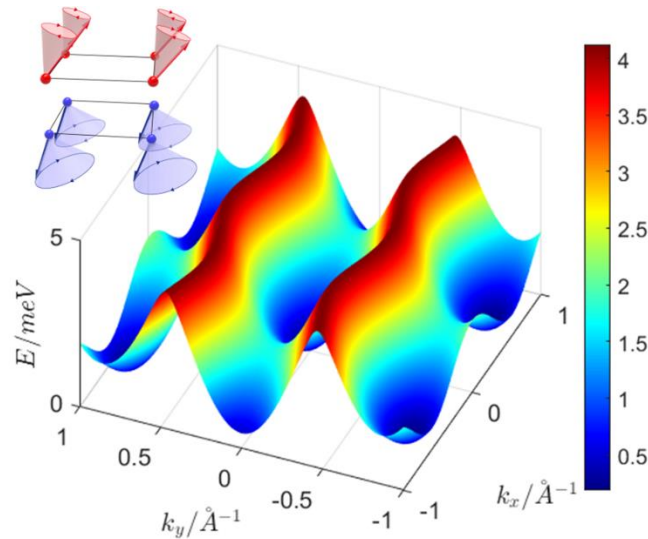

339

340 **Fig. S8.2. Spin model and spin wave modes of CrPS<sub>4</sub> under an in-plane magnetic**  
341 **field.** Anisotropic  $E_1$  magnon band structure of bilayer CrPS<sub>4</sub> when the in-plane  
342 anisotropic nearest neighbor coupling  $J_1=-2.96\text{meV}$ ,  $J_2=-2.09\text{meV}$ ,  $J_3=-0.51\text{meV}$ ,  
343 interlayer coupling  $J_c=0.16\text{meV}$ , the magnetic anisotropy  $D_z = 0.0058\text{meV}$  and an  
344 in-plane magnetic field of 4T along the  $x$  direction.

345

346

347

348 **S9. Modeling spin Seebeck effect in CrPS<sub>4</sub>**

349 Based on a semi-classical Boltzmann transport theory of magnon in  
 350 anti-ferromagnet<sup>7</sup>, we will give an expression for spin Seebeck coefficient of CrPS<sub>4</sub> at  
 351 finite temperature and finite magnetic field in this section.

352

353 Here we first consider the experimental configuration for Device-S, where the  
 354 magnetic field is along  $y$  axis. The spin density along the field direction is given by  
 355 magnon creation and annihilation operators:

$$\begin{aligned}
 358 \quad & \sum_{\mathbf{j}} \left( S_{1,\mathbf{j}}^{A,y} + S_{1,\mathbf{j}}^{B,y} + S_{2,\mathbf{j}}^{A,y} + S_{2,\mathbf{j}}^{B,y} \right) \\
 359 \quad & = \sum_{\mathbf{j}} \left( \cos\psi \tilde{S}_{1,\mathbf{j}}^{A,y} + \sin\psi \tilde{S}_{1,\mathbf{j}}^{A,z} + \cos\psi \tilde{S}_{1,\mathbf{j}}^{B,y} + \sin\psi \tilde{S}_{1,\mathbf{j}}^{B,z} + \cos\psi \tilde{S}_{2,\mathbf{j}}^{A,y} \right. \\
 360 \quad & \quad \left. - \sin\psi \tilde{S}_{2,\mathbf{j}}^{A,z} + \cos\psi \tilde{S}_{2,\mathbf{j}}^{B,y} - \sin\psi \tilde{S}_{2,\mathbf{j}}^{B,z} \right) \\
 356 \quad & = \sin\psi \sum_{\mathbf{j}} \left( \tilde{S}_{1,\mathbf{j}}^{A,z} + \tilde{S}_{1,\mathbf{j}}^{B,z} \right) + \cos\psi \sum_{\mathbf{j}} \left( \tilde{S}_{1,\mathbf{j}}^{A,y} + \tilde{S}_{1,\mathbf{j}}^{B,y} \right) - \sin\psi \sum_{\mathbf{j}} \left( \tilde{S}_{2,\mathbf{j}}^{A,z} + \right. \\
 357 \quad & \quad \left. \tilde{S}_{2,\mathbf{j}}^{B,z} \right) + \cos\psi \sum_{\mathbf{j}} \left( \tilde{S}_{2,\mathbf{j}}^{A,y} + \tilde{S}_{2,\mathbf{j}}^{B,y} \right) \\
 361 \quad & = \sin\psi \sum_{\mathbf{j}} (2S - a_{1,\mathbf{j}}^\dagger a_{1,\mathbf{j}} - b_{1,\mathbf{j}}^\dagger b_{1,\mathbf{j}} - a_{2,\mathbf{j}}^\dagger a_{2,\mathbf{j}} - b_{2,\mathbf{j}}^\dagger b_{2,\mathbf{j}}) + \\
 362 \quad & \quad \cos\psi \sum_{\mathbf{j}} \sqrt{\frac{S}{2}} (a_{1,\mathbf{j}}^\dagger + a_{1,\mathbf{j}} + b_{1,\mathbf{j}}^\dagger + b_{1,\mathbf{j}} + a_{2,\mathbf{j}}^\dagger + a_{2,\mathbf{j}} + b_{2,\mathbf{j}}^\dagger + b_{2,\mathbf{j}}). \quad (\text{S10})
 \end{aligned}$$

363

364 The second terms in the last line are linear in the magnon creation or annihilation  
 365 operators, so that they are time-dependent with a factor of  $e^{\pm i \hbar \omega_{1,2,3,4}(\mathbf{k})t + i\phi}$ . Within  
 366 the experimental measurement resolution, these contributions must be averaged to the  
 367 zero. Besides, the initial phase  $\phi$  in the time-dependent factor are equally distributed  
 368 with  $[0, 2\pi]$ , because the magnon are supposed to be thermally activated under the  
 369 injector. After being averaged over the initial  $\phi$ , the contributions must be zero too.  
 370 Thus, we consider the contribution of the first term in equation S10 and obtain the  
 371 average spin projection along the magnetic field as:

$$\begin{aligned}
372 \quad & \sum_j \langle S_{1,j}^{A,y} + S_{1,j}^{B,y} + S_{2,j}^{A,y} + S_{2,j}^{B,y} \rangle \\
373 \quad & = -\sin\psi \sum_{\mathbf{k}} \langle \cosh\delta_1 \gamma_1^\dagger(\mathbf{k}) \gamma_1(\mathbf{k}) + \cosh\delta_2 \gamma_2^\dagger(\mathbf{k}) \gamma_2(\mathbf{k}) \\
374 \quad & + \cosh\delta_3 \gamma_3^\dagger(\mathbf{k}) \gamma_3(\mathbf{k}) + \cosh\delta_4 \gamma_4^\dagger(\mathbf{k}) \gamma_4(\mathbf{k}) \rangle
\end{aligned}$$

375

376 Note that the same signs in angular momenta of the four magnon modes,  $\cosh\delta_1$ ,  
377  $\cosh\delta_2$ ,  $\cosh\delta_3$ ,  $\cosh\delta_4 > 0$ . Since the two magnon modes have different group  
378 velocity  $\mathbf{v}_j(\mathbf{k}) = \nabla_{\mathbf{k}}\omega_j(\mathbf{k})$  ( $j = 1,2,3,4$ ), the spin current density operator  $J_m$  is:

$$\begin{aligned}
379 \quad J_S^y &= -\frac{\hbar}{(2\pi)^2} \sin\psi \int dk_x dk_y \sum_{i=1}^4 \mathbf{v}_i(\mathbf{k}) \cosh\delta_i [n_i(\mathbf{k}) - n_i^0(\mathbf{k})] \\
380 \quad n_i(\mathbf{k}) - n_i^0(\mathbf{k}) &= -\tau_i(\mathbf{k}) \mathbf{v}_i(\mathbf{k}) \cdot \nabla n_i^0(\mathbf{k})
\end{aligned}$$

381

382 For Device-W, a similar  $J_S^x$  could be obtained. We follow the same argument as  
383 Ref.[7], to obtain the spin Seebeck coefficient:

385

$$J_m = \mathbf{S} \cdot \nabla T$$

$$384 \quad \mathbf{S}(T) = \frac{\hbar}{(2\pi)^2 k_B T^2} \sin\psi \int_{BZ} dk_x dk_y \sum_{i=1}^4 \mathbf{v}_i(\mathbf{k}) \cosh\delta_i \mathbf{v}_i(\mathbf{k}) \frac{e^{\frac{\hbar\omega_i}{k_B T}} \hbar\omega_i \tau_i(\mathbf{k})}{\left(e^{\frac{\hbar\omega_i}{k_B T}} - 1\right)^2} \quad (\text{S11})$$

386 where  $\eta_{i,k} = 1/\tau_{i,k}$  is the magnon relaxation time and  $n_i(k) = \langle \gamma_i^\dagger(k) \gamma_i(k) \rangle$  is the  
387 magnon density for the  $i^{\text{th}}$  magnon branch and at magnon momentum  $\mathbf{k}$ .  $\mathbf{v}_i(\mathbf{k}) \mathbf{v}_i(\mathbf{k})$  is  
388 generally in the tensor-form and so is the Seebeck coefficient  $\mathbf{S}$ . The dispersion  
389 relation of the four magnon branches is given in equation S9.

390

391 Thus, we are ready to simulate  $V_{2\omega,0}^S$  and  $V_{2\omega,0}^W$  as<sup>7,8,9</sup>:

$$\begin{aligned}
392 \quad V_{2\omega,0}^{S,W} &= C^{S,W} * [\hat{\mathbf{n}} \cdot \mathbf{S}(T) \cdot \nabla T]_{2\omega} \\
393 \quad &= C^{S,W} * \left[ S_n (2K + c_1^{S,W} I_{in}^2 + c_2^{S,W} I_{gate}^2) * (c_1^{S,W} I_{in}^2 + c_2^{S,W} I_{gate}^2) \right]_{2\omega} \quad (\text{S12})
\end{aligned}$$

394 where, as stated in the main text,  $\hat{\mathbf{n}} = \hat{\mathbf{x}}, \hat{\mathbf{y}}$  are unitary vectors corresponds magnon

395 propagation directions in Device-W and Device-S,  $C^{S,W}$  is an overall constant,  $c_1^{S,W}$   
 396 and  $c_2^{S,W}$  are heating efficiency of the injector and gate along the two directions,  
 397 respectively, and  $[\dots]_{2\omega}$  means taking the second harmonic component.

398

### 399 **S10. Ignorable out-of-plane spin Seebeck coefficient $\mathbf{S}_z(T)$**

400 We extend our model in Supplementary S8 and S9 to three-dimension and  
 401 calculate the out-of-plane spin Seebeck coefficient  $\mathbf{S}_z(T)$ . Magnetism for the bulk  
 402 CrPS<sub>4</sub> is described by the following Hamiltonian:

$$403 \quad H = \sum_{\mathbf{j}} \sum_{m=1,2,3,4} J_{a_m} \mathbf{S}_{\mathbf{j}}^A \cdot \mathbf{S}_{\mathbf{j}+\mathbf{a}_m}^B - D \sum_{\mathbf{j}} \left[ (S_{\mathbf{j}}^{A,z})^2 + (S_{\mathbf{j}}^{B,z})^2 \right] - h \sum_{\mathbf{j}} [S_{\mathbf{j}}^{A,y} + S_{\mathbf{j}}^{B,y}]$$

$$404 \quad + \sum_{\mathbf{j}} J_c (\mathbf{S}_{\mathbf{j}}^A \cdot \mathbf{S}_{\mathbf{j}+\mathbf{a}_5}^A + \mathbf{S}_{\mathbf{j}}^B \cdot \mathbf{S}_{\mathbf{j}+\mathbf{a}_5}^B)$$

405 Here  $D$  is the easy-axis single-ion anisotropy and  $J$  is the magnetic exchange  
 406 coupling with  $J_{a_1} = J_1$ ,  $J_{a_2} = J_2$ ,  $J_{a_3} = J_3$ ,  $J_{a_4} = J_3$ .  $\mathbf{j}$  denotes a monoclinic-lattice  
 407 A-sublattice site, and  $\mathbf{a}_m$  ( $m = 1,2,3,4,5$ ) connects a A-sublattice site and its  
 408 neighboring four B-sublattice sites with  $\mathbf{a}_1 = 0$ ,  $\mathbf{a}_2 = \mathbf{e}_2$ ,  $\mathbf{a}_3 = \mathbf{e}_1$ ,  $\mathbf{a}_4 = \mathbf{e}_2 - \mathbf{e}_1$ .  
 409  $\mathbf{a}_5 = \mathbf{e}_3$  is the normal vector connected two adjacent layers.  $\mathbf{S}_{\mathbf{j}}^A \equiv (S_{\mathbf{j}}^{A,x}, S_{\mathbf{j}}^{A,y}, S_{\mathbf{j}}^{A,z})$   
 410 is a localized spin of Cr atom ( $S=3/2$ ) in the A-sublattice site ( $\mathbf{j}$ ) and  $\mathbf{S}_{\mathbf{j}+\mathbf{a}_m}^B$  is a  
 411 localized Cr spin at the B-sublattice site( $\mathbf{j} + \mathbf{a}_m$ ).

412

413 Under the in-plane field  $h$ , the antiferromagnetically aligned spins will be canted  
 414 linearly towards the field direction:

$$415 \quad \mathbf{S}_{\mathbf{j}}^A = \mathbf{S}_{\mathbf{j}}^B = S(0, \sin\psi, \cos\psi)|_{j_z=2n\mathbf{e}_3}$$

$$416 \quad \mathbf{S}_{\mathbf{j}}^A = \mathbf{S}_{\mathbf{j}}^B = S(0, \sin\psi, -\cos\psi)|_{j_z=(2n+1)\mathbf{e}_3}$$

417 with  $2n$  denotes even layers and  $2n+1$  denotes odd layers. A canting angle is  
 418 determined classically as a minimum of a classical magnetic energy:

$$419 \quad E_{classical} = N(2J_c S^2 (\sin^2 \psi - \cos^2 \psi) - 2DS^2 \cos^2 \psi - 2hS \sin \psi),$$

420 where  $N$  is a number of the A-sublattice sites. The minimum energy is given by:

$$421 \quad \sin \psi = \frac{h}{2(2J_c + D)S}$$

422

423 Magnetic collective excitations around the classical magnetic order are described  
424 by the Holstein-Primakoff bosons:

$$425 \quad \tilde{S}_j^{A,z} = S - a_j^\dagger a_j, \quad \tilde{S}_j^{A,x} - i\tilde{S}_j^{A,y} = \sqrt{2S}a_j^\dagger, \quad \tilde{S}_j^{A,x} + i\tilde{S}_j^{A,y} = \sqrt{2S}a_j$$

$$426 \quad \tilde{S}_j^{B,z} = S - b_j^\dagger b_j, \quad \tilde{S}_j^{B,x} - i\tilde{S}_j^{B,y} = \sqrt{2S}b_j^\dagger, \quad \tilde{S}_j^{B,x} + i\tilde{S}_j^{B,y} = \sqrt{2S}b_j$$

427 where  $(\tilde{S}_j^{A,x}, \tilde{S}_j^{A,y}, \tilde{S}_j^{A,z})$  and  $(\tilde{S}_j^{B,x}, \tilde{S}_j^{B,y}, \tilde{S}_j^{B,z})$  are the spin operators in a rotated  
428 frame:

$$429 \quad \begin{pmatrix} \tilde{S}_j^{\alpha,x} \\ \tilde{S}_j^{\alpha,y} \\ \tilde{S}_j^{\alpha,z} \end{pmatrix} = \begin{pmatrix} 1 & 0 & 0 \\ 0 & \cos\psi & -\sin\psi \\ 0 & \sin\psi & \cos\psi \end{pmatrix} \begin{pmatrix} S_j^{\alpha,x} \\ S_j^{\alpha,y} \\ S_j^{\alpha,z} \end{pmatrix} \Big|_{j_z=2n\mathbf{e}_3}$$

$$430 \quad \begin{pmatrix} \tilde{S}_j^{\alpha,x} \\ \tilde{S}_j^{\alpha,y} \\ \tilde{S}_j^{\alpha,z} \end{pmatrix} = \begin{pmatrix} 1 & 0 & 0 \\ 0 & -\cos\psi & -\sin\psi \\ 0 & \sin\psi & -\cos\psi \end{pmatrix} \begin{pmatrix} S_j^{\alpha,x} \\ S_j^{\alpha,y} \\ S_j^{\alpha,z} \end{pmatrix} \Big|_{j_z=(2n+1)\mathbf{e}_3}$$

431 Here  $\alpha = A, B$ ,  $a$  and  $b$  are Holstein-Primakoff boson fields for A-sublattice Cr  
432 spins and B-sublattice Cr spins, that represent fluctuations around the classical  
433 magnetic order. Around those  $\psi$  that minimize the classical magnetic energy, the  
434 Hamiltonian is stable against such small fluctuations:

$$435 \quad H \equiv E_{classical} + H_{sw} + \mathcal{O}(a^3, b^3)$$

436 Thus, the spin-wave Hamiltonian transformed into the momentum space (here  $\mathbf{k}$  is a  
437 three-dimensional wave vector) is:

$$438 \quad H_{magnon} = \sum_{\mathbf{k}} \Psi^\dagger(\mathbf{k}) \begin{bmatrix} M_0 & f(\mathbf{k}) & N_0 & 0 \\ f^*(\mathbf{k}) & M_0 & 0 & N_0 \\ N_0 & 0 & M_0 & f(\mathbf{k}) \\ 0 & N_0 & f^*(\mathbf{k}) & M_0 \end{bmatrix} \Psi(\mathbf{k})$$

439 with  $\Psi(\mathbf{k}) = (a(\mathbf{k}), b(\mathbf{k}), a^\dagger(-\mathbf{k}), b^\dagger(-\mathbf{k}))^T$ ,  $M_0 = \frac{-J_1S - J_2S - 2J_3S}{2} + DS\cos^2\psi -$

440  $\frac{DS}{2}\sin^2\psi + \frac{h}{2}\sin\psi + J_cS\cos 2\psi + \frac{J_cS}{2}(1 - \cos 2\psi)\cos(\mathbf{k} \cdot \mathbf{a}_5)$ ,  $N_0 = \frac{DS}{2}\sin^2\psi +$

441  $\frac{J_cS}{2}(1 + \cos 2\psi)\cos(\mathbf{k} \cdot \mathbf{a}_5)$ ,  $|f(\mathbf{k})|$  and  $\varphi_{\mathbf{k}}$  are the modulus and phase of  $f(\mathbf{k}) =$

442  $\frac{S}{2} \sum_{m=1,2,3,4} J_{a_m} e^{i\mathbf{k} \cdot \mathbf{a}_m} \equiv |f(\mathbf{k})| e^{i\varphi_{\mathbf{k}}}$  respectively.

443 Under

$$444 \begin{pmatrix} a(\mathbf{k}) \\ b(\mathbf{k}) \\ a^+(-\mathbf{k}) \\ b^+(-\mathbf{k}) \end{pmatrix} = \sigma_0 \otimes \frac{1}{\sqrt{2}} \begin{pmatrix} e^{i\frac{\varphi_{\mathbf{k}}}{2}} & 0 \\ 0 & e^{-i\frac{\varphi_{\mathbf{k}}}{2}} \end{pmatrix} \begin{pmatrix} 1 & -1 \\ 1 & 1 \end{pmatrix} \begin{pmatrix} \alpha_{\mathbf{k}} \\ \beta_{\mathbf{k}} \\ \alpha_{-\mathbf{k}}^\dagger \\ \beta_{-\mathbf{k}}^\dagger \end{pmatrix}$$

$$445 \begin{pmatrix} \alpha_{\mathbf{k}} \\ \alpha_{-\mathbf{k}}^\dagger \end{pmatrix} = \begin{pmatrix} \cosh \frac{\delta_1}{2} & -\sinh \frac{\delta_1}{2} \\ -\sinh \frac{\delta_1}{2} & \cosh \frac{\delta_1}{2} \end{pmatrix} \begin{pmatrix} \gamma_{1,\mathbf{k}} \\ \gamma_{1,-\mathbf{k}}^\dagger \end{pmatrix}, \begin{pmatrix} \beta_{\mathbf{k}} \\ \beta_{-\mathbf{k}}^\dagger \end{pmatrix}$$

$$446 = \begin{pmatrix} \cosh \frac{\delta_2}{2} & \sinh \frac{\delta_2}{2} \\ \sinh \frac{\delta_2}{2} & \cosh \frac{\delta_2}{2} \end{pmatrix} \begin{pmatrix} \gamma_{2,\mathbf{k}} \\ \gamma_{2,-\mathbf{k}}^\dagger \end{pmatrix}$$

447 The spin-wave Hamiltonian is diagonalized as,

$$448 H_{magnon} = \sum_{\mathbf{k}} (\hbar\omega_1(\mathbf{k}) \gamma_1^\dagger(\mathbf{k}) \gamma_1(\mathbf{k}) + \hbar\omega_2(\mathbf{k}) \gamma_2^\dagger(\mathbf{k}) \gamma_2(\mathbf{k}))$$

449 Here,

$$450 \cosh \delta_1 = \frac{M_0 + |f(\mathbf{k})|}{E_1}$$

$$451 \cosh \delta_2 = \frac{M_0 - |f(\mathbf{k})|}{E_1}$$

$$452 E_1(\mathbf{k}) = \hbar\omega_1(\mathbf{k}) = \sqrt{(M_0 + |f(\mathbf{k})|)^2 - N_0^2}$$

$$453 E_2(\mathbf{k}) = \hbar\omega_2(\mathbf{k}) = \sqrt{(M_0 - |f(\mathbf{k})|)^2 - N_0^2}.$$

454 The lowest  $E_2$  spin-wave energy momentum dispersions with  $k_y = 0$  or  $k_x = 0$   
 455 are plotted in Fig. S10. As can be seen, the energy band is nearly dispersionless along  
 456  $k_z$  direction compared to  $k_x$  and  $k_y$ .

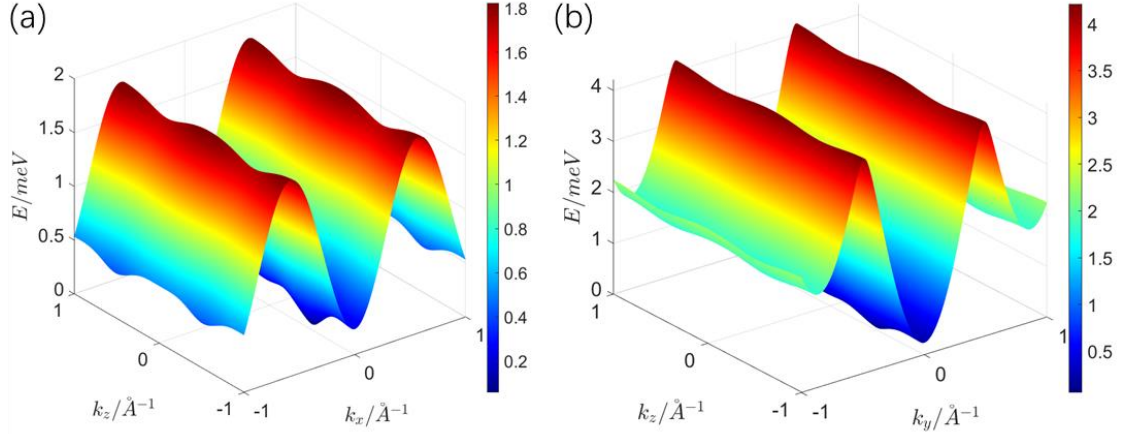

457

458 Fig. S10.1. Three-dimensional spin model and spin wave modes of CrPS<sub>4</sub> under an  
 459 in-plane magnetic field. (a) The lowest  $E_2$  spin-wave energy momentum dispersions  
 460 with  $k_y = 0$ . (b) The lowest  $E_2$  spin-wave energy momentum dispersions with  $k_x =$   
 461 0.

462

463 To get the expression for spin Seebeck coefficient, we first consider the  
 464 experimental configuration for Device-S, where the magnetic field is along the y axis.  
 465 The spin density along the field direction is given by magnon creation and  
 466 annihilation operators:

$$467 \sum_j (S_j^{A,y} + S_j^{B,y}) = \sin\psi \sum_j (2S - a_j^\dagger a_j - b_j^\dagger b_j) + \cos\psi \sum_j \sqrt{\frac{S}{2}} (a_j^\dagger + a_j + b_j^\dagger + b_j)$$

468 We consider the contribution of the first term (the second linear term vanishes in  
 469 average) and obtain the average spin projection along the magnetic field as:

$$470 \sum_j \langle S_j^{A,y} + S_j^{B,y} \rangle = -\sin\psi \sum_{\mathbf{k}} \langle \cosh\delta_1 \gamma_1^\dagger(\mathbf{k}) \gamma_1(\mathbf{k}) + \cosh\delta_2 \gamma_2^\dagger(\mathbf{k}) \gamma_2(\mathbf{k}) \rangle$$

471 With  $n_i(\mathbf{k}) = \langle \gamma_i^\dagger(\mathbf{k}) \gamma_i(\mathbf{k}) \rangle$ , the spin current density operator  $J_m$  is:

$$472 J_S^y = -\frac{\hbar}{(2\pi)^3} \sin\psi \int dk_x dk_y dk_z \sum_{i=1}^2 v_i(\mathbf{k}) \cosh\delta_i [n_i(\mathbf{k}) - n_i^0(\mathbf{k})]$$

$$473 n_i(\mathbf{k}) - n_i^0(\mathbf{k}) = -\tau_i(\mathbf{k}) v_i(\mathbf{k}) \cdot \nabla n_i^0(\mathbf{k})$$

474 For Device-W, a similar  $J_S^x$  could be obtained. Based on  $J_m = \mathbf{S} \cdot \nabla T$ , the  
 475 three-dimensional spin Seebeck coefficient reads:



476 
$$\mathbf{S}(T) = \frac{\hbar}{(2\pi)^3 k_B T^2} \sin\psi \int_{\text{BZ}} dk_x dk_y dk_z \sum_{i=1}^2 \mathbf{v}_i(\mathbf{k}) \cosh\delta_i \mathbf{v}_i(\mathbf{k}) \frac{e^{\frac{\hbar\omega_i}{k_B T}} \hbar\omega_i \tau_i(\mathbf{k})}{\left(e^{\frac{\hbar\omega_i}{k_B T}} - 1\right)^2}$$

477

478 Figure S10.2 shows the calculated spin Seebeck coefficient  $S_n(T)$ . The  
 479 out-of-plane spin Seebeck coefficient  $S_z(T)$  is quite small compared with the  
 480 in-plane coefficients  $S_x(T)$  and  $S_y(T)$  at  $T = 2\text{K}$  and above. This 2D nature of the  
 481 magnon transport in CrPS<sub>4</sub> is warranted by the weak interlayer exchange interaction.

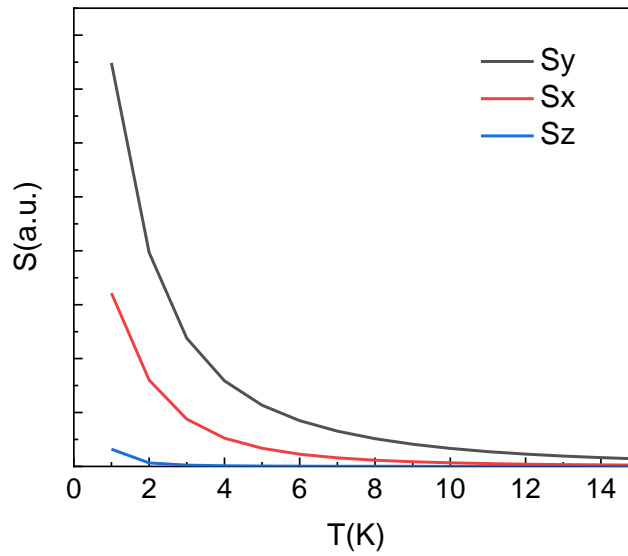

482

483 Fig. S10.2. The simulated spin Seebeck coefficient  $S_n$  with a three-dimensional  
 484 model.

485

486 Since both of the out-of-plane temperature gradient under the detector (see  
 487 Supplementary S11) and the spin Seebeck coefficient  $S_z(T)$  are small, the  
 488 two-dimensional spin transport model could capture the majority of the physics and  
 489 thus the Equation 2 in the main text is a good approximation at the moment. It is  
 490 indeed interesting to provide a more comprehensive theory to the experimental result  
 491 we obtained in this manuscript, and we hope that our experimental work could  
 492 stimulate further discussions and theoretical works in the field.

493

494

495 **S11. Finite element analysis of the temperature and spin chemical potential**  
 496 **distribution in CrPS<sub>4</sub> device**

497 To clarify how the heat flows in the sample and how it affects the distribution of  
 498 the temperature gradient in the sample in the in-plane and out-of-plane directions,  
 499 we perform additional finite element analyses (*Phys. Rev. B* 96, 104441 (2017)) of the  
 500 temperature distribution and magnon chemical potential distribution for CrPS<sub>4</sub>  
 501 magnon valve devices with crystal thickness of 30nm.

502

503 The linear response relation of heat and spin transport in the bulk of a magnetic  
 504 insulator reads:

$$505 \begin{pmatrix} \frac{2e}{\hbar} \mathbf{j}_m \\ \mathbf{j}_Q \end{pmatrix} = - \begin{pmatrix} \sigma_m & \mathbf{S}/T \\ \mathbf{S} & \kappa \end{pmatrix} \begin{pmatrix} \nabla \mu_m \\ \nabla T \end{pmatrix}$$

506 where  $\mathbf{j}_m$  is the magnon spin current,  $\mathbf{j}_Q$  the total heat current,  $\mu_m$  the magnon  
 507 chemical potential,  $T$  the temperature,  $\sigma_m$  the magnon spin conductivity,  $\kappa$  the total  
 508 heat conductivity and  $\mathbf{S}$  the spin Seebeck coefficient. Combined with  $\nabla \cdot \mathbf{j}_Q = \frac{j_c^2}{\sigma_{Pt}}$ ,

509 and  $\nabla \cdot \mathbf{j}_m = -\frac{\hbar \sigma_m}{2e \lambda_m^2} \mu_m$ , the diffusion equations for spin and heat read:

$$510 \begin{aligned} \mathbf{S} \cdot \nabla^2 \mu_m + \kappa \cdot \nabla^2 T &= -\frac{j_c^2}{\sigma_{Pt}} \\ 511 \sigma_m \cdot \nabla^2 \mu_m + \mathbf{S} \cdot \nabla \left( \frac{\nabla T}{T} \right) &= \frac{\sigma_m \cdot \mu_m}{\lambda_m^2} \end{aligned}$$

512 where  $j_c$  is the charge current density in the injector Pt electrode,  $\sigma_{Pt}$  is the  
 513 electrical conductivity of the Pt electrode and  $\lambda_m$  the magnon spin diffusion length.

514

515 Since CrPS<sub>4</sub> is not as widely studied as YIG, some parameters are unavailable,  
 516 let alone considering the anisotropy. For the parameters related to temperature  
 517 gradient distribution analysis, there is no thermal conductivity data found for CrPS<sub>4</sub> in  
 518 the literature. Here we use the in-plane thermal conductivity 6.3[W/(m\*K)] for  
 519 MnPS<sub>3</sub> as an rough estimate of the thermal conductivity for CrPS<sub>4</sub> along the <010>  
 520 direction, and the through-plane thermal conductivity 1.1[W/(m\*K)] for MnPS<sub>3</sub> as the  
 521 through-plane thermal conductivity for CrPS<sub>4</sub>. Based on our fitting parameters  $c_1^S =$

522  $1.7 \times 10^{-4} \text{K}/\mu\text{A}^2$ ,  $c_2^S = 1.2 \times 10^{-4} \text{K}/\mu\text{A}^2$  for Device-S (magnon transports along  
 523 the  $\langle 010 \rangle$  direction) and  $c_1^W = 4.9 \times 10^{-4} \text{K}/\mu\text{A}^2$ ,  $c_2^W = 3.8 \times 10^{-4} \text{K}/\mu\text{A}^2$  for  
 524 Device-W (magnon transports along the  $\langle 100 \rangle$  direction), an average  $\nabla T^W / \nabla T^S$  of 3  
 525 times is obtained. Since the heating power is fixed in our experiment, the  $\langle 100 \rangle$   
 526 thermal conductivity for CrPS<sub>4</sub> is estimated to be 3 times smaller than the  $\langle 010 \rangle$   
 527 thermal conductivity, which is  $2.1 [\text{W}/(\text{m} \cdot \text{K})]$ .

528

529 For the parameters related to spin chemical potential distribution analysis, the  
 530 ratio for the spin Seebeck coefficient components  $S_y : S_x : S_z = 1 : 0.404 : 0.017$  are  
 531 obtained from our model (details in our reply to reviewer's comment #2 and in Fig.  
 532 R3 below). Here we use the spin Seebeck coefficient  $500 [\text{A}/\text{m}]$  for YIG as  $S_y$  for  
 533 CrPS<sub>4</sub>, then applying the ratio above, one can obtain  $S_x = 202 [\text{A}/\text{m}]$  and  $S_z =$   
 534  $8.5 [\text{A}/\text{m}]$ . For the magnon spin conductivity  $\sigma_m$ , since the calculation procedure of  
 535  $\sigma_m$  is similar to the calculation for  $S$  in our model used in Supplementary S10, would  
 536 simply provide the resulting ratio in the following discussion. By adding the chemical  
 537 potential  $\mu_m$  generated by SSE caused magnons accumulation under the injector  
 538  $n_i^0(k) = \frac{1}{e^{\frac{\hbar\omega_i - e\mu_m}{k_B T}} - 1}$  in our model, the spin current density reads:

$$539 \quad J_m = S \cdot \nabla T + \frac{\hbar}{2e} \sigma_m \cdot \nabla \mu_m$$

540 The resulted magnon spin conductivity is:

$$541 \quad \sigma_m(T) = \frac{2e^2}{(2\pi)^3 k_B T} \sin\psi \int_{BZ} dk_x dk_y dk_z \sum_{i=1}^2 v_i(\mathbf{k}) \cosh\delta_i v_i(\mathbf{k}) \frac{e^{\frac{\hbar\omega_i}{k_B T}} \tau_i(\mathbf{k})}{\left(e^{\frac{\hbar\omega_i}{k_B T}} - 1\right)^2}$$

542 Thus we could get the ratio for the magnon spin conductivity components  
 543  $\sigma_{my} : \sigma_{mx} : \sigma_{mz} = 1 : 0.419 : 0.037$ . Here we use the magnon spin conductivity  
 544  $9000 [\text{S}/\text{m}]$  for YIG as  $\sigma_{my}$  for CrPS<sub>4</sub>, then  $\sigma_{mx} = 3771 [\text{S}/\text{m}]$  and  $\sigma_{mz} =$   
 545  $333 [\text{S}/\text{m}]$ . As for the magnon spin diffusion length  $\lambda_m$ , we extracted  $\lambda_{my} =$   
 546  $0.87 \mu\text{m}$  and  $\lambda_{mx} = 0.45 \mu\text{m}$  from  $R_{2\omega} = \frac{c_0}{\lambda_m} * \frac{\exp(d/\lambda_m)}{1 - \exp(2d/\lambda_m)}$  (Nat. Phys. 11,  
 547 1022-1026 (2015)) using  $R_{2\omega}^S(d = 0.75 \mu\text{m}) = 0.527 \text{nV}/\mu\text{A}^2$ ,  $R_{2\omega}^S(d = 1.5 \mu\text{m}) =$   
 548  $0.189 \text{nV}/\mu\text{A}^2$  for Device-S and  $R_{2\omega}^W(d = 0.75 \mu\text{m}) = 0.352 \text{nV}/\mu\text{A}^2$ ,  $R_{2\omega}^W(d =$

549  $1.5\mu\text{m}) = 0.064\text{nV}/\mu\text{A}^2$  for Device-W. The  $R_{2\omega}$  values are obtained from the linear  
550 slopes of  $V_{2\omega,0}$  vs.  $I_{in}^2$  curves for device2 shown in Fig. 2d in our main text and Fig.  
551 S3.2d in the Supplementary information. All the parameters used in the finite element  
552 analysis are listed below:

|                                     |                                             |                                                    |                                                          |
|-------------------------------------|---------------------------------------------|----------------------------------------------------|----------------------------------------------------------|
| Pt                                  | Conductivity                                | 8.9E6[S/m]                                         | COMSOL Material database                                 |
|                                     | thermal conductivity                        | 71.6[W/(m*K)]                                      | COMSOL Material database                                 |
| CrPS <sub>4</sub>                   | in-plane <010> thermal conductivity         | 6.3[W/(m*K)]                                       | ACS Nano,14, 2424–2435(2020) for MnPS <sub>3</sub>       |
|                                     | in-plane <100> thermal conductivity         | 2.1[W/(m*K)]                                       | calculated                                               |
|                                     | through-plane thermal conductivity          | 1.1[W/(m*K)]                                       | ACS Nano,14, 2424–2435(2020) for MnPS <sub>3</sub>       |
|                                     | in-plane <010> spin Seebeck coefficient     | 500[A/m]                                           | Phys. Rev. B 96, 104441 (2017) for YIG                   |
|                                     | in-plane <100> spin Seebeck coefficient     | 202[A/m]                                           | calculated                                               |
|                                     | through-plane spin Seebeck coefficient      | 8.5[A/m]                                           | calculated                                               |
|                                     | in-plane <010> magnon spin conductivity     | 9000[S/m]                                          | Phys. Rev. B 94, 180402(R) (2016) for YIG                |
|                                     | in-plane <100> magnon spin conductivity     | 3771[S/m]                                          | calculated                                               |
|                                     | through-plane magnon spin conductivity      | 333[S/m]                                           | calculated                                               |
|                                     | in-plane <010> magnon spin diffusion length | $0.87\mu\text{m}$                                  | From experimental data                                   |
|                                     | in-plane <100> magnon spin diffusion length | $0.45\mu\text{m}$                                  | From experimental data                                   |
| SiO <sub>2</sub>                    | thermal conductivity                        | 1.38[W/(m*K)]                                      | CRC Handbook of Chemistry and Physics (92nd ed.).p12.213 |
| Si                                  | thermal conductivity                        | 130[W/(m*K)]                                       | COMSOL Material database                                 |
| CrPS <sub>4</sub> /SiO <sub>2</sub> | through-plane thermal resistance            | $5\text{E-}7[\text{K}\cdot\text{m}^2/\text{W}]^\#$ | Computational Materials Science,                         |

|                      |                                  |                                                       |                                      |
|----------------------|----------------------------------|-------------------------------------------------------|--------------------------------------|
|                      |                                  |                                                       | 142, 1–6 (2018)                      |
| Pt/CrPS <sub>4</sub> | through-plane thermal resistance | $1.4E-7[\text{K}\cdot\text{m}^2/\text{W}]^{\text{s}}$ | PHYSICAL REVIEW B 101, 205407 (2020) |

553 Table S10. The parameters used in the finite element analysis. <sup>#</sup>There is no data found  
554 for CrPS<sub>4</sub>/SiO<sub>2</sub> in the literature, we used value from through-plane thermal resistance  
555 between MoS<sub>2</sub>/SiO<sub>2</sub> instead. <sup>s</sup>There is no data found for Pt/CrPS<sub>4</sub>, we used estimated  
556 value for CrBr<sub>3</sub>/Pt in the literature.

557

558 In the simulations, the sample thickness is  $t_{\text{CrPS}_4} = 30$  nm and the width of the  
559 crystal is  $w_{\text{CrPS}_4} = 10$   $\mu\text{m}$ . The crystal is placed on top of a silicon substrate with a  
560 SiO<sub>2</sub> layer of 300 nm thick. The injector electrode has a thickness of  $t_{\text{Pt}} = 10$  nm and a  
561 width of  $w_{\text{Pt}} = 250$  nm. The heat current normal to the CrPS<sub>4</sub>|vacuum and Pt|vacuum  
562 interfaces is set to be zero. The spin current normal to the CrPS<sub>4</sub>|vacuum and  
563 CrPS<sub>4</sub>|SiO<sub>2</sub> interfaces is also set to be zero. We have performed finite element analysis  
564 for a MnPS<sub>3</sub> device having similar configuration in *Nat. Commun.* **12**, 6279 (2021),  
565 which gives a temperature around 3K at the bottom of the Pt injector. Since here we  
566 have adopted the thermal conductivity for MnPS<sub>3</sub> as for CrPS<sub>4</sub>, to simplify the  
567 simulation, the boundary condition  $T = 3\text{K}$  at the bottom of the Pt injector is used.

568

569 As shown in Figure R1, under the detector electrodes ( $1.5\mu\text{m}$  away from the  
570 injectors), both the in-plane temperature gradients and the out-of-plane temperature  
571 gradients are negligible for Device-S and Device-W. The large local out-of-plane  
572 temperature gradient should cause a large local SSE signal, and it is indeed detected  
573 experimentally, as shown in Fig. S6 in the Supplementary information. However,  
574 different from the local signal, the nonlocal signal is mainly caused by the thermal  
575 magnons diffusing to the detector. The resultant spin chemical potential distribution  
576 has similar behavior to YIG (*Phys. Rev. B* 96, 104441 2017) that the chemical  
577 potential changes sign because of the depletion of magnons below the injector and an  
578 accumulation of magnons at the CrPS<sub>4</sub>|SiO<sub>2</sub> interface. The finite element analysis  
579 shows that out-of-plane temperature gradient plays a minimal role in our nonlocal

580 experiment.

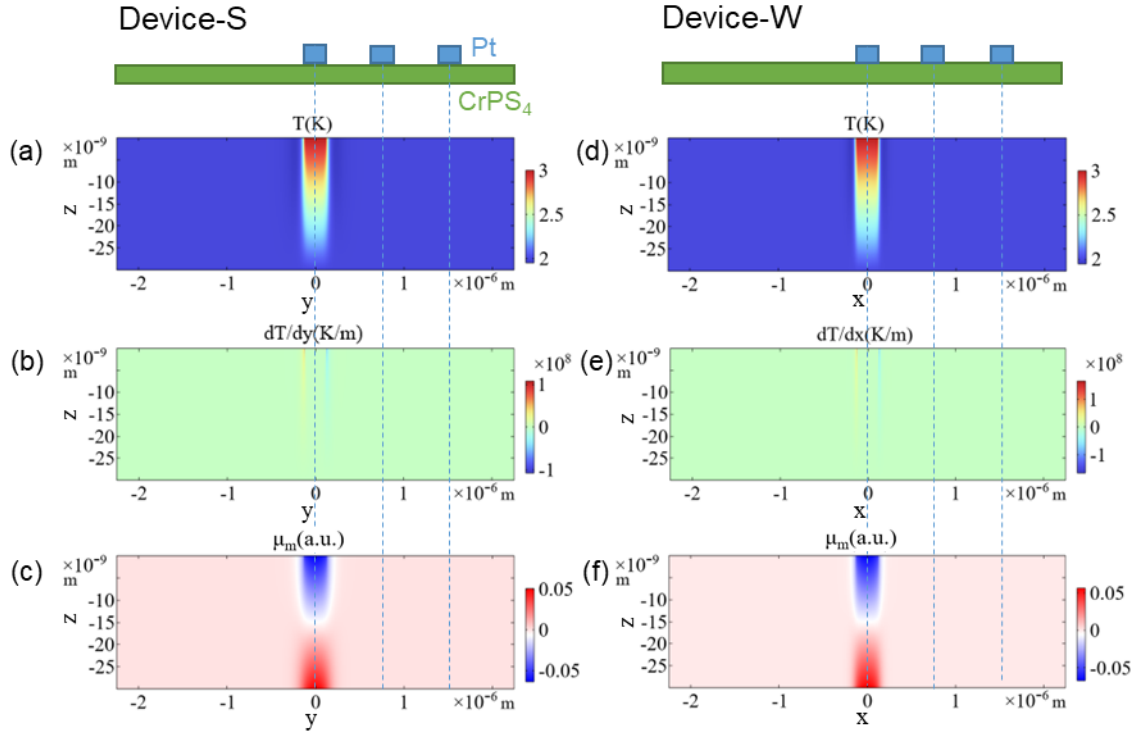

581

582 **Fig. S11. Finite element analysis of the temperature and spin chemical potential**  
 583 **distribution in CrPS<sub>4</sub> device.** (a) Temperature, (b) temperature gradient and (c) spin  
 584 chemical potential distribution in  $yz$  plane for Device-S. (d) Temperature, (e)  
 585 temperature gradient and (f) spin chemical potential distribution in  $xz$  plane for  
 586 Device-W.

587

588 **S12. Simulated and experimental  $V_{2\omega,0}^S$  and  $V_{2\omega,0}^W$  vs.  $I_{gate}$  curves**

589 As discussed in the previous section, the simulation of  $V_{2\omega,0}^{S,W}$  can be achieved via  
 590 equation (S12) with only three global parameters. Root means square deviation  
 591 between the simulated curves and the experimental curves is calculated, and  
 592 minimizing this deviation gives us the best values of the three global parameters:  
 593  $C^S = 0.527 \times 10^{-26} \text{V} \cdot \text{s}/\hbar$ ,  $c_1^S = 1.7 \times 10^{-4} \text{K}/\mu\text{A}^2$  and  $c_2^S = 1.2 \times 10^{-4} \text{K}/\mu\text{A}^2$   
 594 for Device-S and  $C^W = 0.484 \times 10^{-26} \text{V} \cdot \text{s}/\hbar$ ,  $c_1^W = 4.9 \times 10^{-4} \text{K}/\mu\text{A}^2$  and  $c_2^W =$   
 595  $3.8 \times 10^{-4} \text{K}/\mu\text{A}^2$  for Device-W shown in Figure 3 in the main text.

596

597 These global parameters can produce  $V_{2\omega,0}^S$  and  $V_{2\omega,0}^W$  curves as a function of  
 598  $I_{gate}$  under multiple values of magnetic field in Fig. S12. For the two magnon  
 599 transport directions, the simulated zero crossing points  $I_0^S$  and  $I_0^W$  all increase  
 600 monotonically with the increase of magnetic field, which is consistent with  
 601 experiment. The above agreements between the simulation and the experimental data  
 602 suggest that our model captures the physical trends behind the behavior of the CrPS<sub>4</sub>  
 603 devices. In Supplementary Section S13 we further prove that exchange anisotropy is  
 604 the key factor that produces the main features observed experimentally, while other  
 605 factors, such as anisotropic thermal conductivity, anisotropic magnon scattering rate  
 606 and anisotropic phonon-magnon coupling along the  $\langle 100 \rangle$  and  $\langle 010 \rangle$  directions in  
 607 CrPS<sub>4</sub> may play a role in shaping the excellent performance of the electrically tunable  
 608 anisotropy of SHM in CrPS<sub>4</sub> magnon valves.

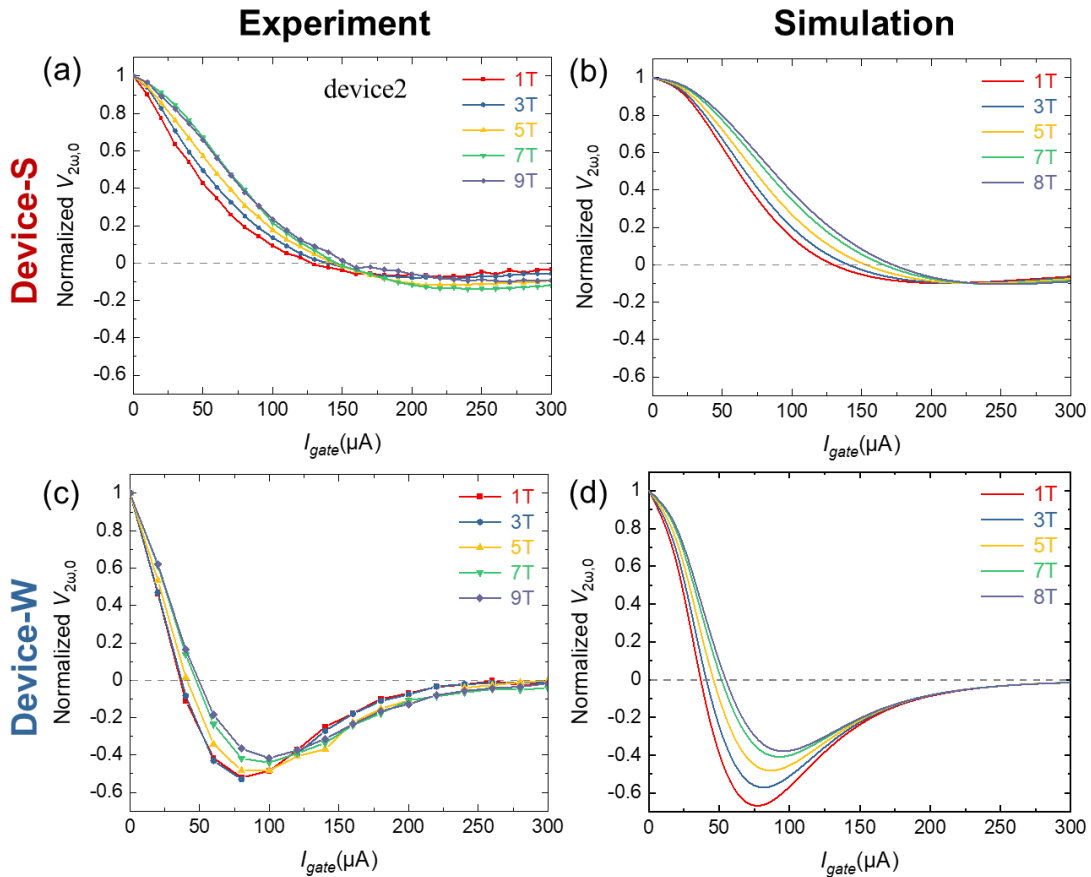

609

610 **Fig. S12.**  $I_{gate}$  dependent  $V_{2\omega,0}^S$  and  $V_{2\omega,0}^W$  under various magnetic field:

611 **Experiments and Simulations.** (a) Experiment and (b) Simulation of normalized

612  $V_{2\omega,0}^S$  as a function of  $I_{gate}$  under multiple values of magnetic field. (c) Experiment  
 613 and (d) Simulation of normalized  $V_{2\omega,0}^W$  as a function of  $I_{gate}$  under multiple values  
 614 of magnetic field. Only three global parameters are needed to produce all the  
 615 simulation curves which match well with the experimental data.

616

### 617 **S13. Simulation analysis for anisotropic magnon transport tuning**

618 To further analyze the anisotropic gate tuning effect of the magnon transport in  
 619 CrPS<sub>4</sub>, we decompose the simulated SHM signal to  $S_n$ ,  $\nabla T$  components for device2  
 620 shown in Figure 3 in the main text, and display their dependence on  $I_{gate}^2$  in Fig.  
 621 S13.1a. First, due to the highly anisotropic dispersion resulted by the anisotropy of  
 622 magnetic exchange coupling, the band dispersion along  $\langle 010 \rangle$  direction (with  
 623 stronger magnetic coupling) has a larger group velocity  $\mathbf{v} = \frac{\partial E}{\partial k}$ , thus  $S_y$  for  
 624 Device-S has a larger amplitude than  $S_x$  for Device-W, which has been discussed in  
 625 section S8. Second, the anisotropic lattice could induce anisotropic thermal  
 626 conductivity, leading to anisotropic temperature gradient in the device. With these  
 627 two factors, the spin current  $J_m$  for Device-W reach to its maximum faster than  
 628 Device-S with increasing the square of the gate current  $I_{gate}^2$  as shown in Fig. S13.1b.  
 629 In our real-time lock-in measurement, the maximum point of  $J_m$  corresponds to the  
 630 sign reversal point of  $V_{2\omega,0}$ , because the thermally driven magnon spin current  $J_m$   
 631 first increase and then decrease with  $I_{gate}^2$ , i.e. magnons are accumulating and  
 632 flowing away below the detector electrode<sup>10</sup>. Thus, Device-W could be tuned faster to  
 633 zero than Device-S by the DC current.

634

635 In order to test if the anisotropic exchange interaction is the dominant cause of  
 636 the anisotropic magnon transport behavior, we plot another simulated  $V_{2\omega,0}^S$  vs.  $I_{gate}$   
 637 curve for Device-S using the same parameters obtained from fitting the experimental  
 638  $V_{2\omega,0}^W$  vs.  $I_{gate}$  curve of Device-W:  $C^W = 0.484 \times 10^{-26} \text{V} \cdot \text{s} / \hbar$ ,  $c_1^W = 4.9 \times 10^{-4} \text{K}$



639  $\mu\text{A}^2$  and  $c_2^W = 3.8 \times 10^{-4} \text{K}/\mu\text{A}^2$ , as shown in Fig. S13.2b. Fig.13.2a is the  
 640 experimental data for device 2, which is the same as shown in Fig. 3a in the main text.  
 641 As can be seen in Fig. 13.2b, the simulated signal of Device-S is about four times  
 642 stronger than the signal of Device-W without DC modulation, which well reproduced  
 643 the experimental data. Besides, the simulation captures the most important feature of  
 644 the two zero points  $I_{0,1}^{S,W}$  with  $I_{0,1}^S > I_{0,1}^W$ . This indicates that, compared with  
 645 anisotropic thermal effect, the anisotropy of the spin Seebeck coefficient  $\mathbf{S}$  caused by  
 646 the anisotropic in-plane magnetic exchange coupling is the main reason for the  
 647 anisotropic magnon transport tuning.

648

649 That being said, the value of  $c_1^S$  is different from  $c_1^W$ , and  $c_2^S$  is different from  
 650  $c_2^W$ , in order to get the best fit to the experimental data as shown in Fig. 3a, which  
 651 point to effects beyond anisotropic exchange coupling. Possible additional factors  
 652 includes but not limited to anisotropic thermal conductivity, anisotropic magnon  
 653 scattering rate and anisotropic phonon-magnon coupling along the  $\langle 100 \rangle$  and  $\langle 010 \rangle$   
 654 directions in CrPS<sub>4</sub>, which are currently unknown experimentally, and warrant further  
 655 investigation in future studies.

656

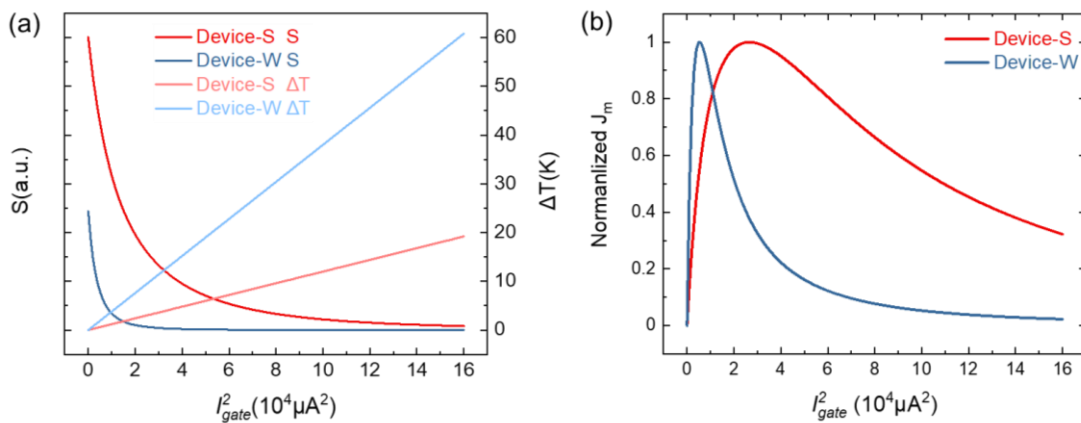

657

658 **Fig. S13.1. Anisotropic Spin Seebeck effect in CrPS<sub>4</sub>.** (a) The simulated spin  
 659 Seebeck coefficient  $S_n$  and temperature difference  $\Delta T$  for Device-S (red curves)  
 660 and Device-W (blue curves) as a function of the square of the gate current  $I_{gate}^2$ .

661 The simulated normalized spin current  $J_m$  for Device-S (red curves) and Device-W  
 662 (blue curves) as a function of the square of the gate current  $I_{gate}^2$ .

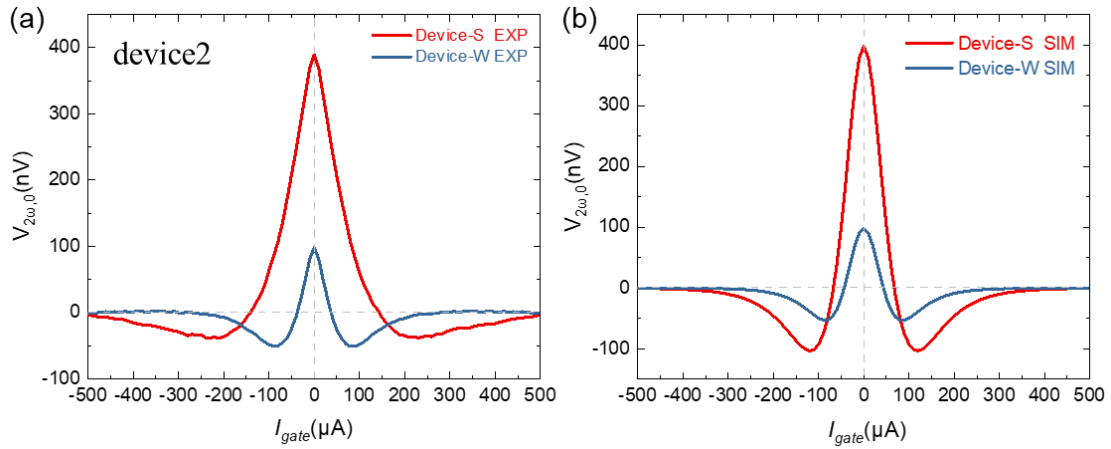

663

664 **Fig. S13.2. Simulation results of DC gate tuning for  $V_{2\omega,0}^{S,W}$  using the same**  
 665 **heating efficiency parameters. (a) Experimental results of Device-S (red curve) and**  
 666 **Device-W (blue curve), same as shown in Fig.3a in the main text. (b) The  $V_{2\omega,0}^S$  plot**  
 667 **of Device-S (red curve) using the same heating parameters as Device-W's simulated**  
 668 **curve (blue curve).**

669

670 **S14. Stability test of few-layer CrPS<sub>4</sub> devices**

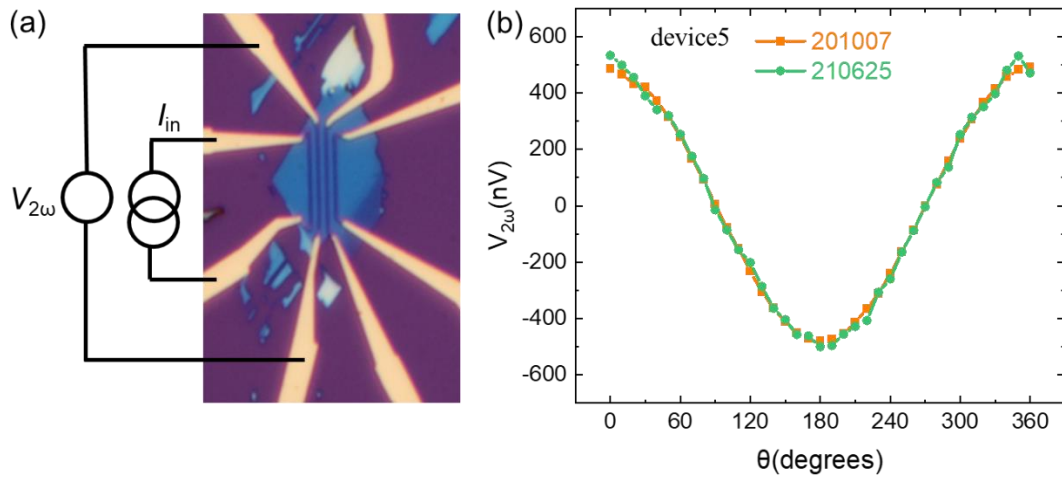

671

672 **Fig. S14. Stability test of few-layer CrPS<sub>4</sub> crystals and devices. (a) The optical**  
 673 **micrograph of few-layer CrPS<sub>4</sub> on SiO<sub>2</sub> substrate after exfoliation for about 9 months.**  
 674 **(b) The device performance of our CrPS<sub>4</sub> device right after fabrication and after about**

675 9 months.

676

### 677 **S15. Possible applications of the magnon ROM**

678 It is worth noting that with its peculiar readout scheme, such magnon ROMs can  
679 serve in special purposed information storage such as inscribing proprietary and  
680 confidential information. That is to say, the information stored in such magnon ROMs  
681 is out of reach for persons without a prior knowledge of several factors including the  
682 Néel temperature of the channel materials, the channel crystal orientation and  
683 magnetization direction, the preset  $I_{gate}$ , etc. The anisotropic magnon ROM could  
684 also be used to store two sets of digital information, which can be read out using two  
685 different gate currents (i.e.,  $I_{gate} = I_0^S$  and  $I_{gate} = I_0^W$  represent two sets of  
686 information for the same ROM). Multi-state (instead of binary) memory can in  
687 principle be engineered by making use of the nonlinear and anisotropic relation  
688 between  $I_{gate}$  and  $I_{read}$  along the two directions.

689

### 690 **References**

- 691 1. Lee, J. et al. Structural and Optical Properties of Single- and Few-Layer  
692 Magnetic Semiconductor CrPS<sub>4</sub>. *ACS nano* **11**, 10935-10944 (2017).
- 693 2. Joe, M., Lee, J., Lee, C. Dominant in-plane cleavage direction of CrPS<sub>4</sub>.  
694 *Comput. Mater. Sci.* **162**, 277-280 (2019).
- 695 3. Liu, Y. et al. Raman Signatures of Broken Inversion Symmetry and In-Plane  
696 Anisotropy in Type-II Weyl Semimetal Candidate TaIrTe<sub>4</sub>. *Adv. Mater.* **30**,  
697 e1706402 (2018).
- 698 4. Kim, S., Lee, J., Lee, C., Ryu, S. Polarized Raman Spectra and Complex  
699 Raman Tensors of Antiferromagnetic Semiconductor CrPS<sub>4</sub>. *J. Phys. Chem. C*  
700 **125**, 2691-2698 (2021).
- 701 5. Liu, T. et al. Spin caloritronics in a CrBr<sub>3</sub>-based magnetic van der Waals  
702 heterostructure. *Phys. Rev. B* **101**, 205407 (2020).
- 703 6. Calder, S. et al. Magnetic structure and exchange interactions in the layered  
704 semiconductor CrPS<sub>4</sub>. *Phys. Rev. B* **102**, 024408 (2020).
- 705 7. Rezende, S. M., Rodríguez-Suárez, R. L., Azevedo, A. Theory of the spin  
706 Seebeck effect in antiferromagnets. *Phys. Rev. B* **93**, 014425 (2016).
- 707 8. Sanders, D. J., Walton, D. Effect of magnon-phonon thermal relaxation on  
708 heat transport by magnons. *Phys. Rev. B* **15**, 1489-1494 (1977).
- 709 9. Agrawal, M. et al. Direct measurement of magnon temperature: new insight

710 into magnon-phonon coupling in magnetic insulators. *Phys. Rev. Lett.* **111**,  
711 107204 (2013).  
712 10. Chen, G. et al. Electrically switchable van der Waals magnon valves. *Nat.*  
713 *Commun.* **12**, 6279 (2021).  
714
